# Supplementary material for: The structural basis of Cdc7-Dbf4 kinase dependent targeting and phosphorylation of the MCM2-7 double hexamer
Source: PubMed Central journal article supplement (PMC9133112; doi:10.1038/s41467-022-30576-1), 2022-05-25
Supplement: 41467_2022_30576_MOESM1_ESM.pdf [file 41467_2022_30576_MOESM1_ESM.pdf]

## **Supplementary Information**

### **The structural basis of Cdc7-Dbf4 kinase dependent targeting and phosphorylation of the MCM2-7 double hexamer**

Almutasem Saleh<sup>1,\*</sup>, Yasunori Noguchi<sup>1,\*</sup>, Ricardo Aramayo<sup>1</sup>, Marina E. Ivanova<sup>1</sup>, Kathryn M. Stevens<sup>1,2</sup>, Alex Montoya<sup>3</sup>, Sunidhi S<sup>4</sup>, Nicolas Lopez Carranza<sup>4</sup>, Marcin J. Skwark<sup>4</sup>, and Christian Speck<sup>1,2</sup>

<sup>1</sup> DNA Replication Group, Institute of Clinical Sciences, Faculty of Medicine, Imperial College London, London W12 0NN, UK

<sup>2</sup> MRC London Institute of Medical Sciences (LMS), W12 0NN London, United Kingdom.

<sup>3</sup> Proteomics and Metabolomics Facility, MRC London Institute of Medical Sciences, Imperial College London, Hammersmith Hospital Campus, Du Cane Road, London, W12 0NN, UK

<sup>4</sup> InstaDeep Ltd, 2 Eastbourne Terrace, London, W2 6LG, UK

\* These authors contributed equally

Correspondence: [chris.speck@imperial.ac.uk](mailto:chris.speck@imperial.ac.uk)

This Supplementary Information contains: 13 Supplementary Figures, 9 Supplementary Tables and 5 Supplementary Movies.

a

MD + ATP $\gamma$ S / ADP-BeF $_3$  sample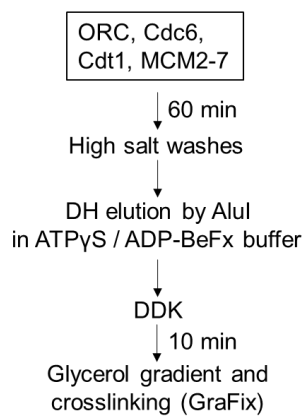

b

MD+ATP sample

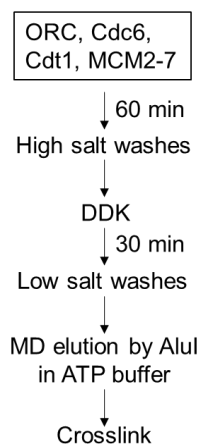

c

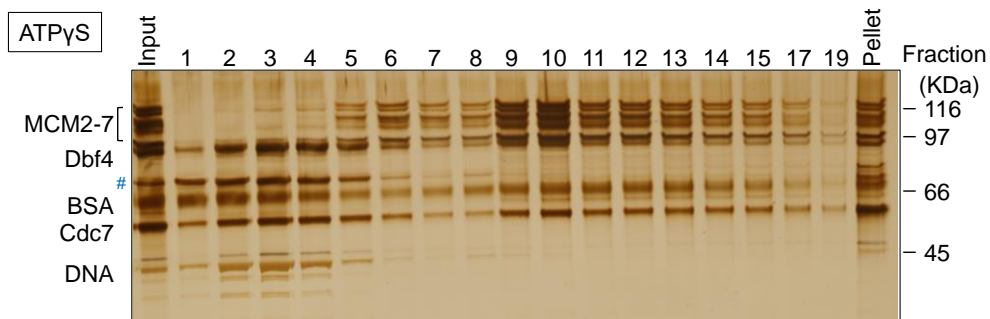

d

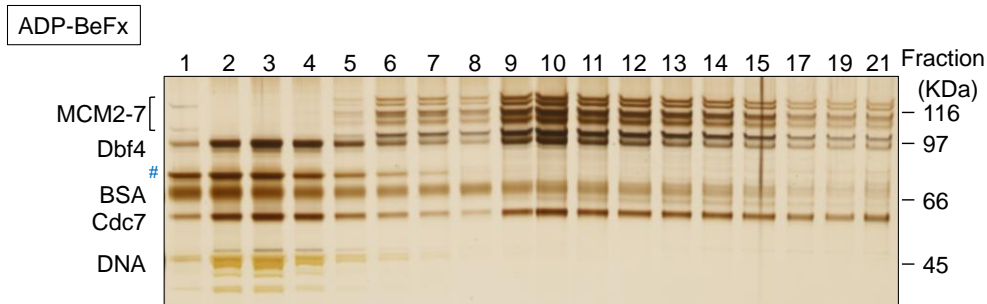

e

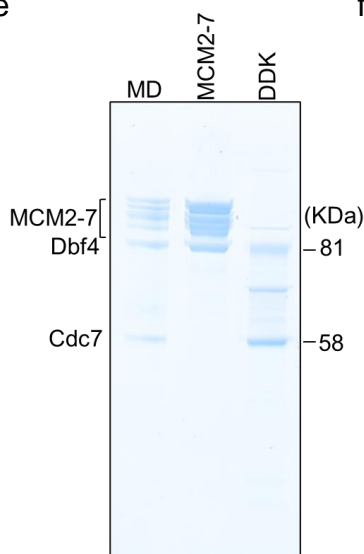

f

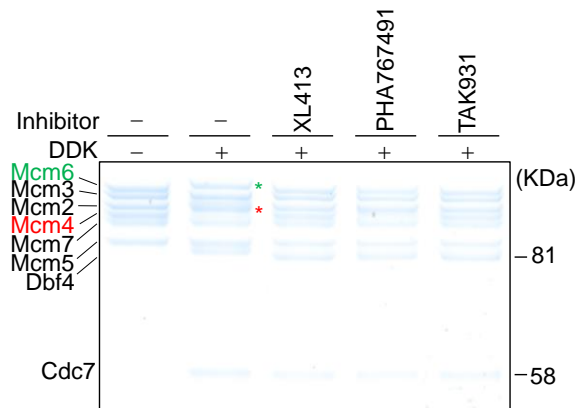

g

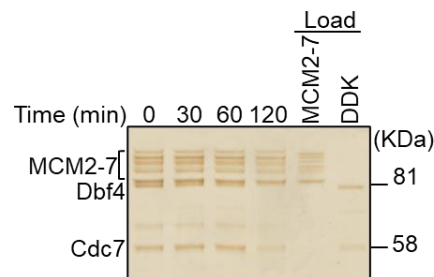

**Supplementary Figure 1. *In vitro* reconstitution of the MD complex and kinase activity inhibition. a-b.** Reaction scheme of the cryo-EM sample preparation method used for **(a)** MD-(ATP $\gamma$ S) and MD-(ADP:BeF $_3$ ) and **(b)** MD-ATP. **c-d.** SDS-PAGE of glycerol gradient fractions of the MD complex in the presence of **(c)** ATP $\gamma$ S and **(d)** ADP:BeF $_3$ . The fractions marked with a red dotted square correspond to the same pooled fractions in the crosslinked gradient (GraFix) used for cryo-EM sample preparation. The band labelled # is a contamination originating from the DDK purification (heat shock protein Ssa1). **e.** SDS-PAGE of MD-(ATP) complex sample prior to crosslinking. **f.** SDS-PAGE of kinase activity inhibition assay. The MCM2-7 DH bound to DNA-beads was incubated in pre-RC buffer with 100  $\mu$ M ATP and 300 nM DDK in the presence of 100  $\mu$ M Cdc7 inhibitor. The DNA-beads were washed and the MD complex was eluted and then analysed by SDS-PAGE and stained by Coomassie blue. **g.** MD complex time course stability assay. The MD complex was reconstituted on DNA-beads, left at room temperature, washed with pre-RC buffer, eluted at different time points and then analysed by SDS-PAGE and silver staining. In each experiment similar results were obtained in at least two independent experiments.

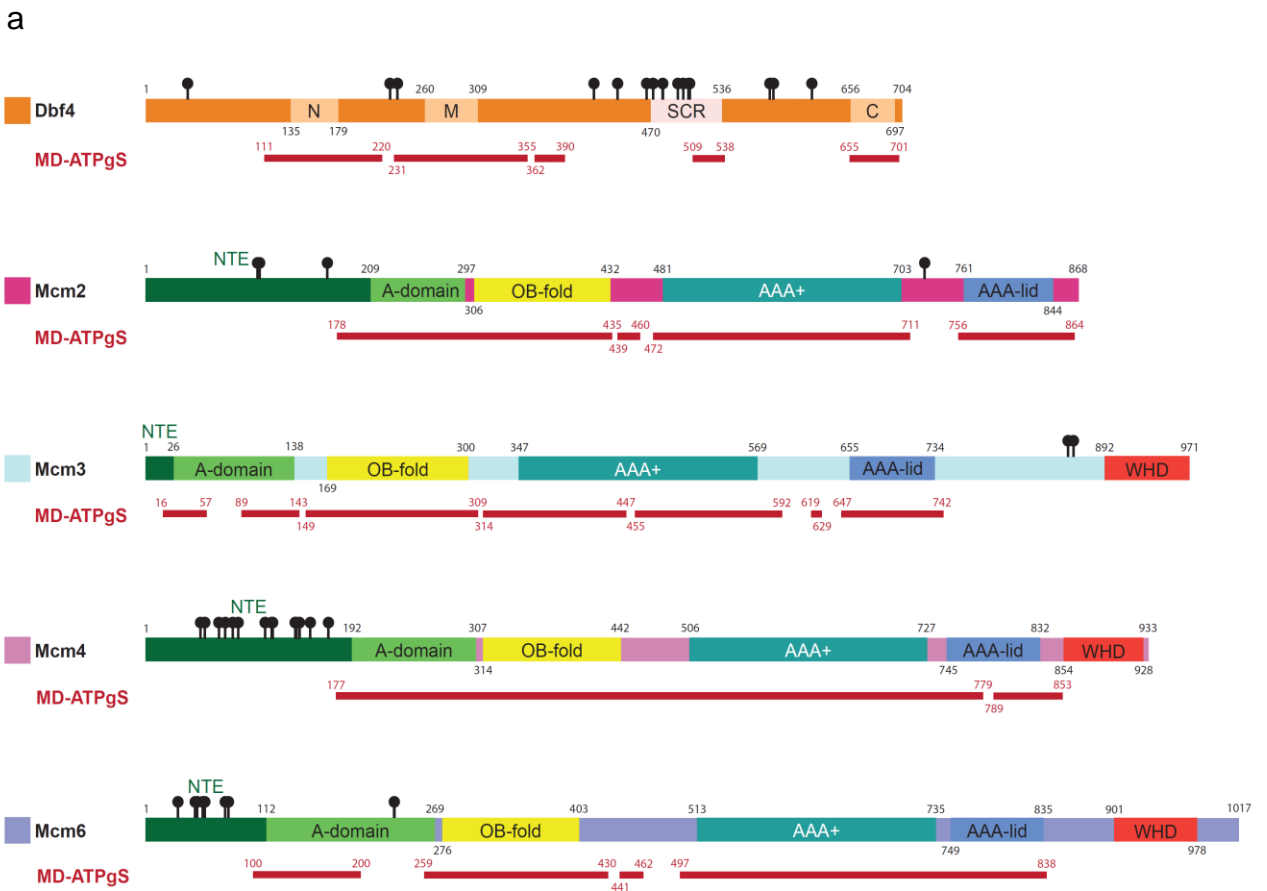

**b**

**Mcm2** 101 QQELSLERR RIDAQLNERD RLLRNVAIID DEDEEQEGAA QLDEMGLPVQ 150  
 RRRRRRQYED LENSDDDLLS DMDIDPLREE 180

**Mcm4** 1 MSQQSSSPTK EDNNSSSPVV PNPDSVPPQL SSPALFYSSS SSQGDIIYGRN 50  
 NSQNLSSQEGE NIRAAIGSSP LNFPSSSQRQ NSDVFQSQGR QGRIRSSASA 100  
 SGRSRYHSDL RSDRALPTSS SSLGRNGQNR VHMRRNDIHT SDLSSPRRIV 150  
 DFDTRSGVNT LDTSSSSAPP SEASEPLRII 180

**Mcm6** 1 MSSPFPADTP SSNRPSNSSP PPSSIGAGFG SSSGLDSQIG SRLHFPSSSQ 50  
 PHVNSQQTGP FVNDSTQFSS QRLQTDGSAT 80

**Supplementary Figure 2. DDK-dependent phosphorylation sites of MCM2-7 and DDK.**

**a.** Schematic diagram to illustrate the domain organization and features of components of the MCM2-7-DDK (MD) complex from budding yeast (*Sc. Saccharomyces cerevisiae*). The structurally resolved regions of each protein subunit from data acquired in this study are indicated by red colored bars. The DDK-dependent thio-phosphorylation sites determined by phosphoproteomic are indicated by black pins. **b.** Sequence of the N-terminal region of Mcm2, Mcm4 and Mcm6. The DDK-dependent thio-phosphorylation sites within the MD complex are highlighted in red. Refer to Supplementary Fig 4 for domain abbreviations.

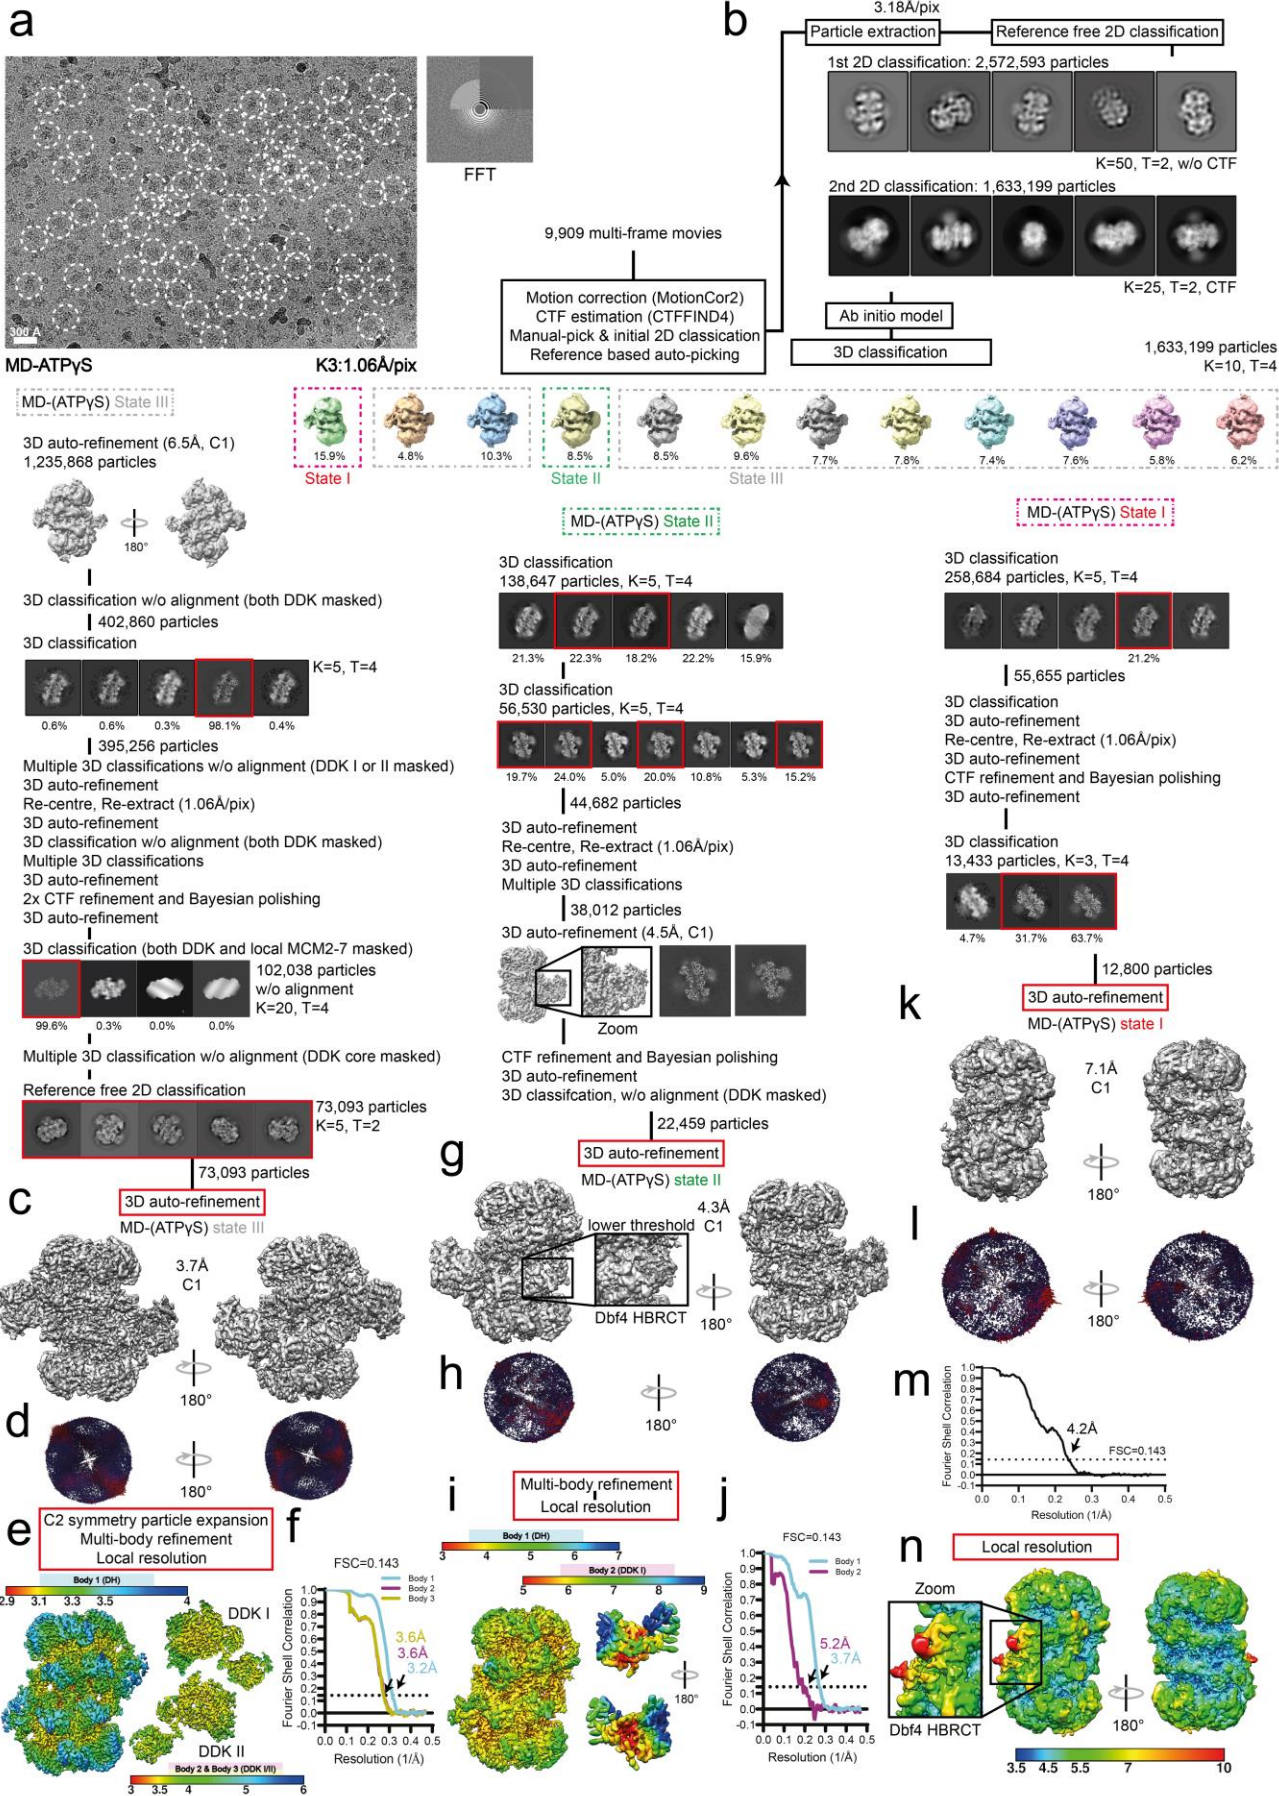

**Supplementary Figure 3. Cryo-EM image processing work-flow and 3D reconstruction of the MD-(ATP $\gamma$ S) complex.**

**a.** Representative cryo-EM micrograph and corresponding fast Fourier transform (FFT). The micrograph features monodisperse particles of MD-(ATP $\gamma$ S) which are indicated by dotted circles. Scale bar is also shown. **b.** Image data processing work-flow. **c.** 3D auto-refined map of MD-(ATP $\gamma$ S) state III at 3.7Å mean resolution. **d.** Euler angle particle distribution of map shown in **(c)**. **e.** Multibody-body auto-refined MD-(ATP $\gamma$ S) state III maps of the DH and DDK. The MD-(ATP $\gamma$ S) state III map was split into three separate bodies for multi-body refinement and the resulting local resolution estimation of the three different bodies is shown. **f.** Gold-standard Fourier Shell Correlation plot of masked multi-body MD-(ATP $\gamma$ S) state III maps. **g.** 3D auto-refined map of MD-(ATP $\gamma$ S) state II at 4.3Å mean resolution. **h.** Euler angle particle distribution of map shown in **(g)**. **i.** Multibody-body auto-refined MD-(ATP $\gamma$ S) state II maps of the DH and DDK. The MD-(ATP $\gamma$ S) state II map was split into two separate bodies for multi-body refinement and the resulting local resolution estimation of the two different bodies is shown. **j.** Gold-standard Fourier Shell Correlation plot of masked multi-body MD-(ATP $\gamma$ S) state II maps. **k.** 3D auto-refined map of MD-(ATP $\gamma$ S) state I at 7.1Å mean resolution. **l.** Euler angle particle distribution of map shown in **(k)**. **m.** Gold-standard Fourier Shell Correlation plot of post-processed MD-(ATP $\gamma$ S) state I map with a loose soft mask and a B-factor of 0 applied. **n.** Local resolution estimation of the MD-(ATP $\gamma$ S) state I map. The Euler angle particle distribution plots shown were generated using the RELION bild file output (blue bar represents the presence of a particle 2D view at a defined angle and red bar indicates a relatively high number of particles with that angle view). The front and back views of the bodies featuring mainly DDK regions are shown. Resolution values shown are in angstroms.

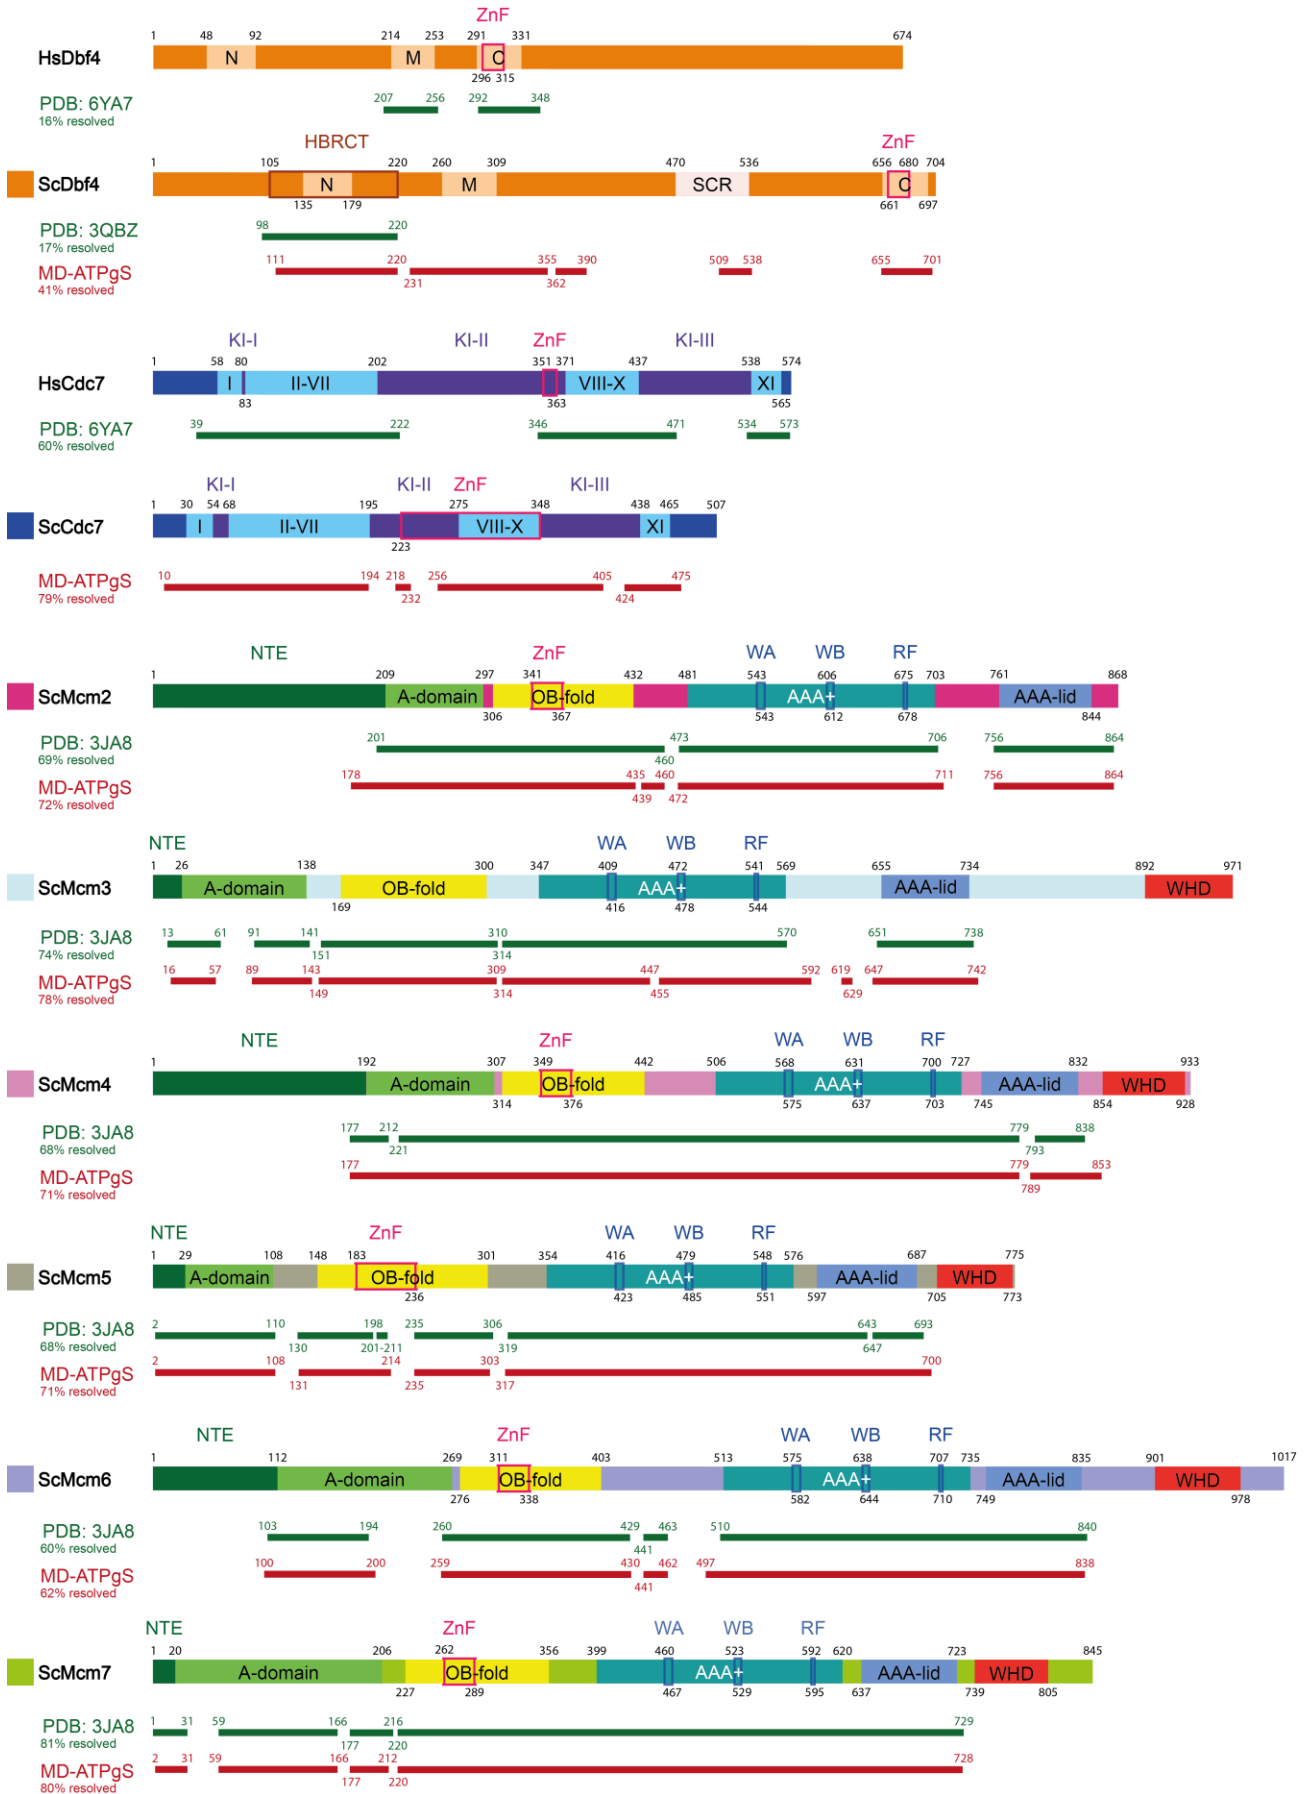

#### **Supplementary Figure 4. 2D domain organization of MCM2-7, Cdc7 and Dbf4.**

Schematic diagram to illustrate the domain organization and features of components of the MCM2-7-DDK (MD) complex from budding yeast (*Sc, Saccharomyces cerevisiae*). (*Hs, Homo sapiens*) homolog proteins of Cdc7 and Dbf4 are shown for comparison. The structurally resolved regions of each protein subunit from previously available data (green colored bar) versus data acquired in this study (red colored bar) are indicated. The MCM2-7 proteins harbor the following domains: N-terminal extension (NTE) domain, A-domain, oligonucleotide binding fold (OB-fold) domain, AAA+ ATPase (AAA+) domain and winged helix (WHD) domain. The MCM OB domain has additional distinct motifs such as: Walker A (WA) motif, Walker B (WB) motif and arginine finger (RF) motif. The domain boundary of residues involved in the coordination of zinc ions is indicated by the zinc finger (ZF) domain. The Cdc7 kinase is a highly conserved protein among all eukaryotes. The highly conserved catalytic kinase domains are indicated by the roman numerals I-IV and the less conserved kinase insert domains as (KI). The Dbf4 regulatory protein features three unique motifs and a modified domain: motif-N, motif-M and motif-C and  $\alpha$ -helix-BRCA1 C-terminal (HBRCT) domain. The substrate coordinating region (SCR) of Dbf4 is currently only attributed to yeast species.



a

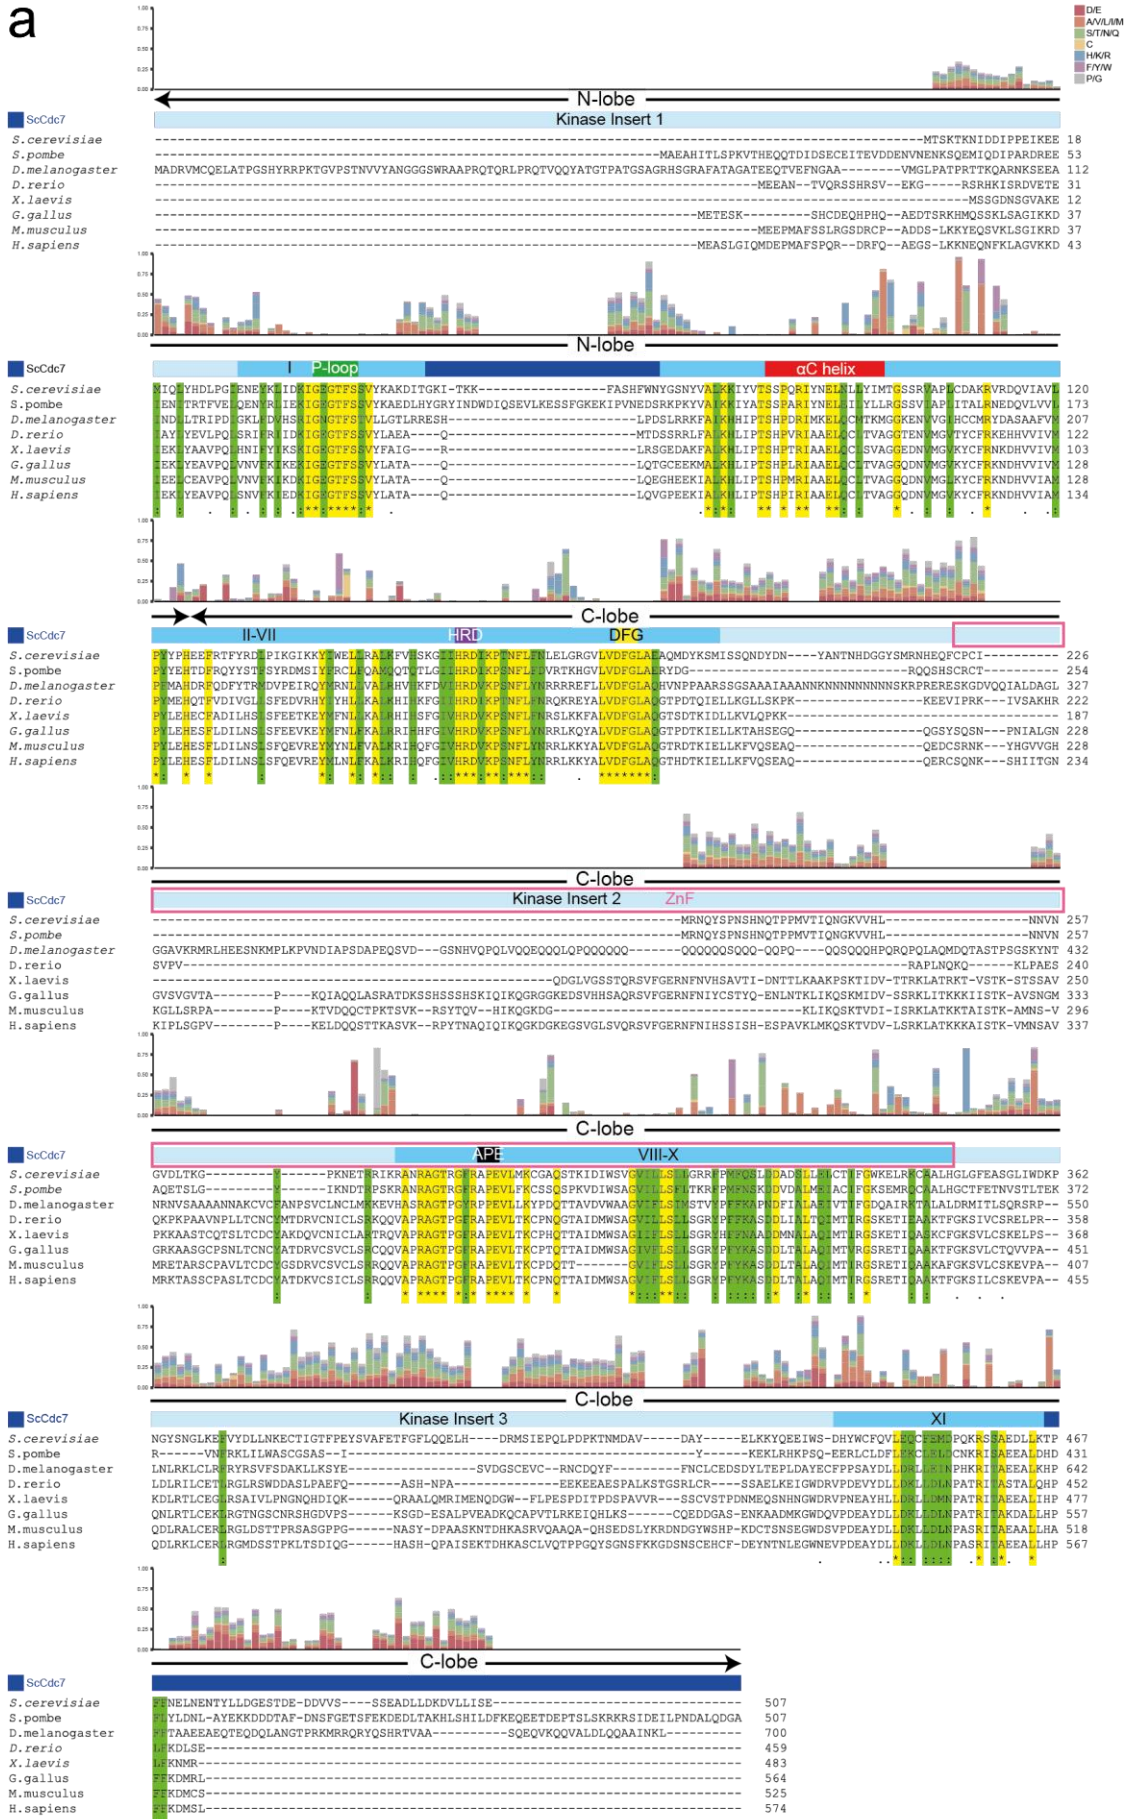

b

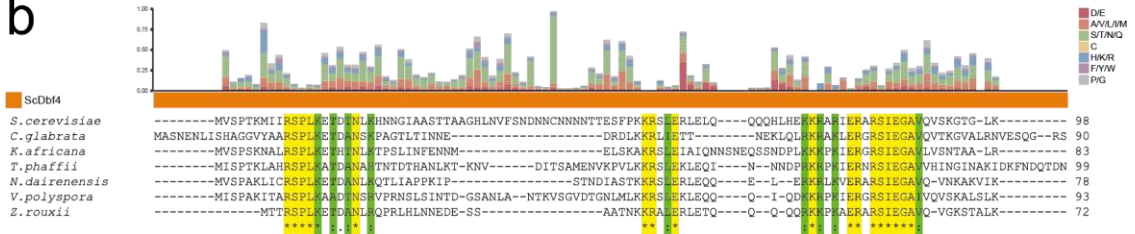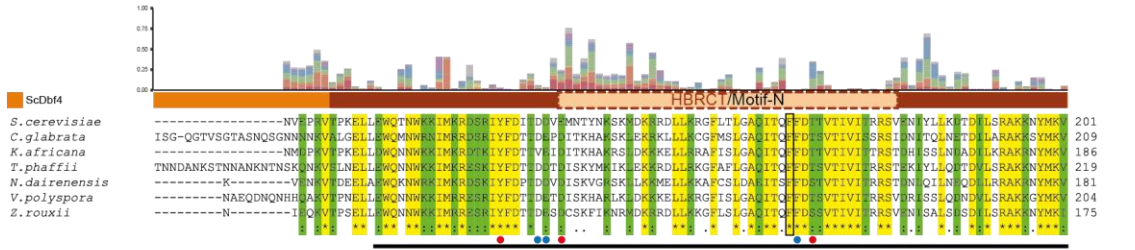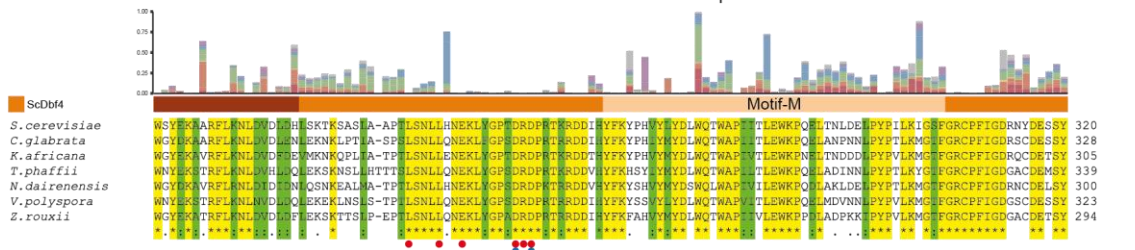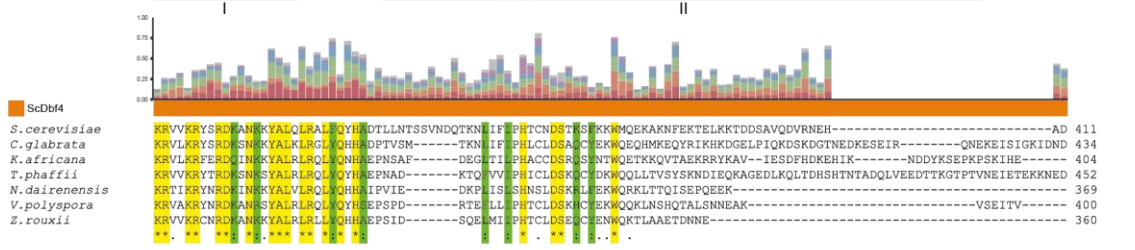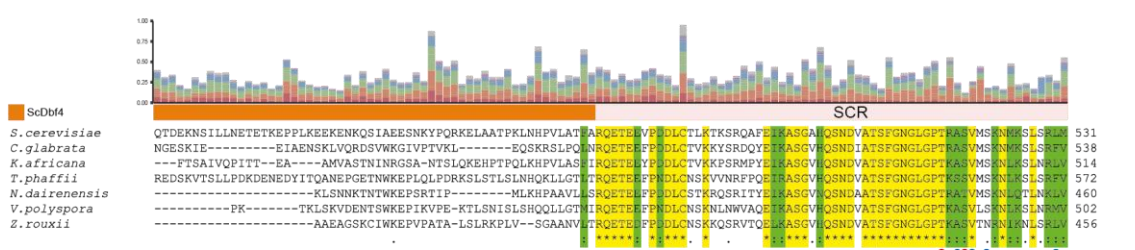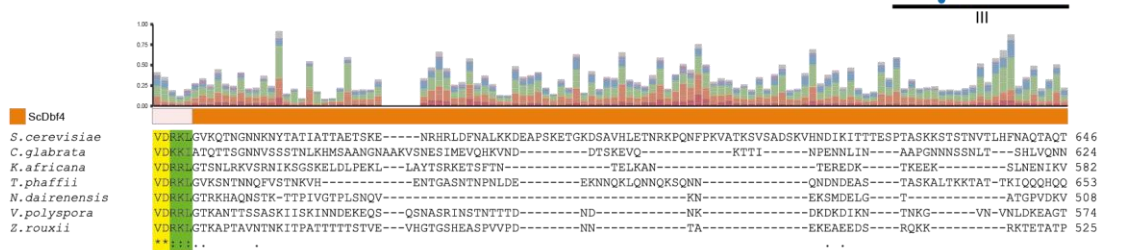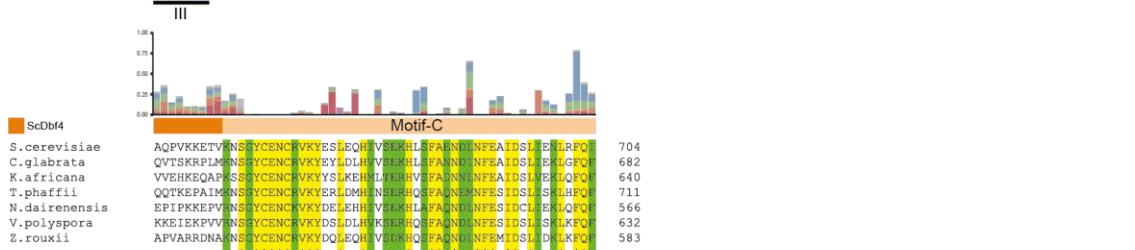

IV

**Supplementary Figure 5. Multiple sequence alignment of Cdc7 and Dbf4 proteins showing transition probabilities for each residue.**

Cdc7 and Dbf4 proteins were aligned using Clustal Omega. Highly conserved residues are coloured with a vertical yellow line and indicated by the symbol (\*), highly similar residues are coloured with a vertical green line and indicated by the symbol (:), and residues with similar properties are indicated by the symbol (.). The predicted probability of transition of the initial standard protein residue to another amino acid type is shown. The probability of transition is represented as a stacked bar coloured by the type of amino acid.

**a.** Aligned Cdc7 from *S. cerevisiae*, *Schizosaccharomyces pombe*, *Drosophila melanogaster*, *Danio rerio*, *Xenopus laevis*, *Gallus gallus*, *Mus musculus* and *Homo sapiens*. Cdc7 domain boundaries, kinase inserts and important motifs are highlighted above the alignment. **b.** Aligned Dbf4/Dbf4-type domain-containing proteins from the budding yeast species: *S. cerevisiae*, *Candida glabrata*, *Kazachstania africana*, *Tetrapisispora phaffii*, *Naumovozya dairenensis*, *Zygosaccharomyces rouxii* and *Vanderwaltozyma polyspora*. The Dbf4 protein residues which form contacts with MCM2-7 via backbone or side chain interactions are indicated by a blue or red circular dot, respectively. The black bar indicates the four (I-IV) distinct regions of Dbf4 which are at the interface with MCM2-7. Dbf4 F165 is highlighted with a black box. scDbf4 (orange horizontal bar), harbors the following domains:  $\alpha$ -helix-BRCA1 C-terminal (HBRCT) domain, motif-N, motif-M and motif-C (named based on the positions along the polypeptide chain) and substrate coordinating region (SCR). The domain boundary of the SCR was determined from both structural data and the multiple sequence alignment shown.

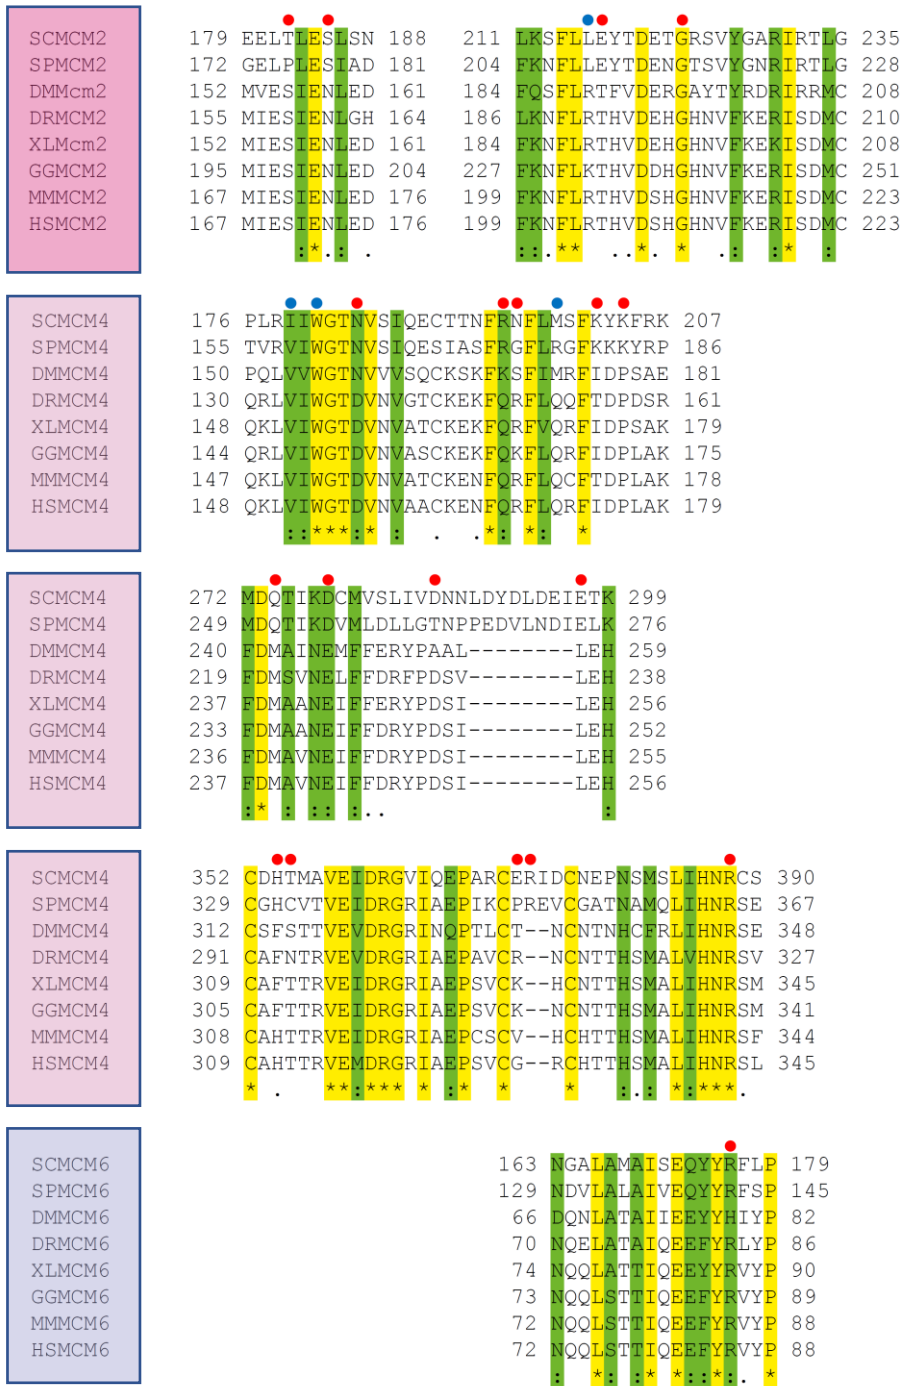

**Supplementary Figure 6. MCM2-7 sequence alignment.** Multiple sequence alignment of different regions of Mcm2, Mcm4 and Mcm6. The multiple sequence alignment was generated with various species using Clustal Omega. Highly conserved residues are coloured with a vertical yellow line and indicated by the symbol (\*), highly similar residues are coloured with a vertical green line and indicated by the symbol (:), and residues with similar properties are indicated by the symbol (.). The residues of Mcm subunits that form interactions with Dbf4, in the MD-(ATP $\gamma$ S) state III atomic model, via backbone or side chain interactions are labelled by a blue dot or red dot, respectively. SC: *S. cerevisiae*, SP: *S. pombe*, DM: *D. melanogaster*, DR: *D. rerio*, XL: *X. laevis*, GG: *G. gallus*, MM: *M. musculus*, HS: *H. sapiens*.

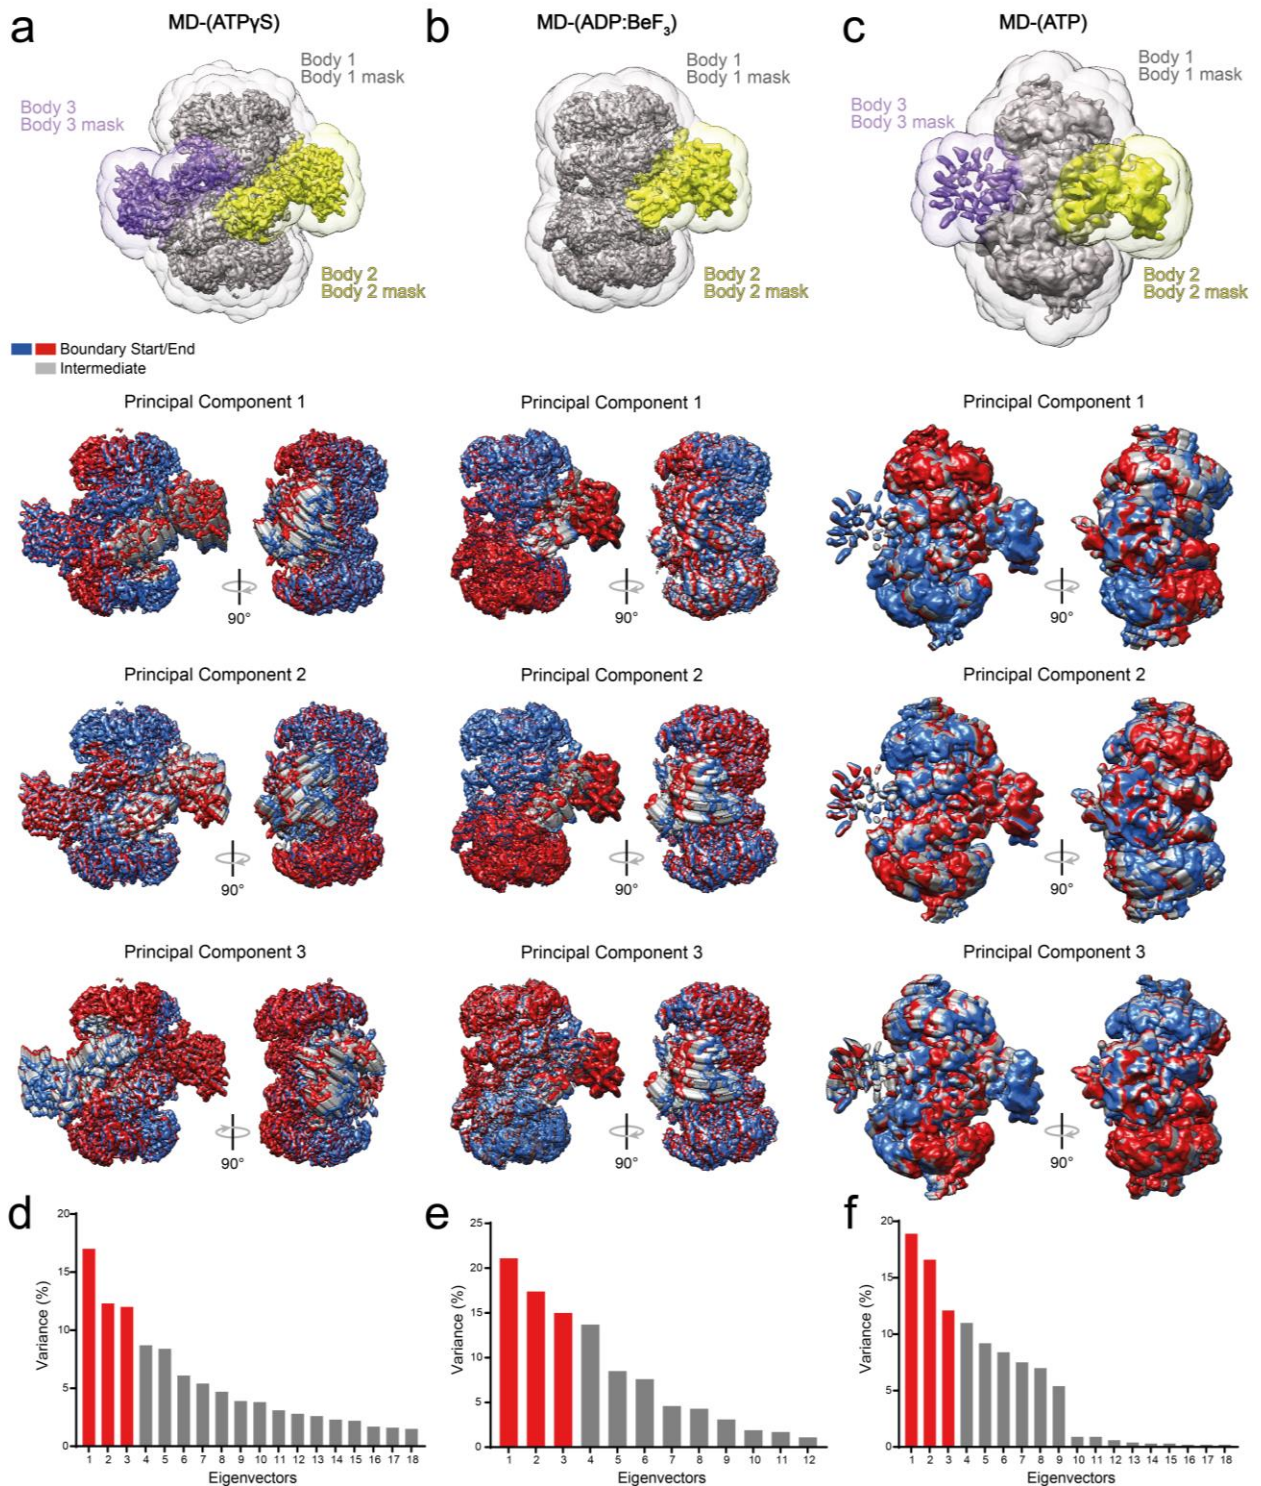

**Supplementary Figure 7. Multi-body refinement and flexible analysis of MD complexes in the presence of different nucleotides.** a-c. 3D auto-refined maps, of (a) MD-(ATP $\gamma$ S), (b) MD-(ADP:BeF $_3$ ) and (c) MD-(ATP) and associated segmented loose soft masks used for multi-body refinement and flexible analysis in RELION. Flexible analysis of the multi-body refinement of each different data set reveals the dynamic movements of DDK relative to the DH. The three main principal components are shown for each structure. d-f. The first 3 eigenvectors (red colored bars) explain 41.2%, 53.5% and 47.5% of the variance in the MD-(ATP $\gamma$ S), MD-(ADP:BeF $_3$ ) and MD-(ATP) data, respectively.

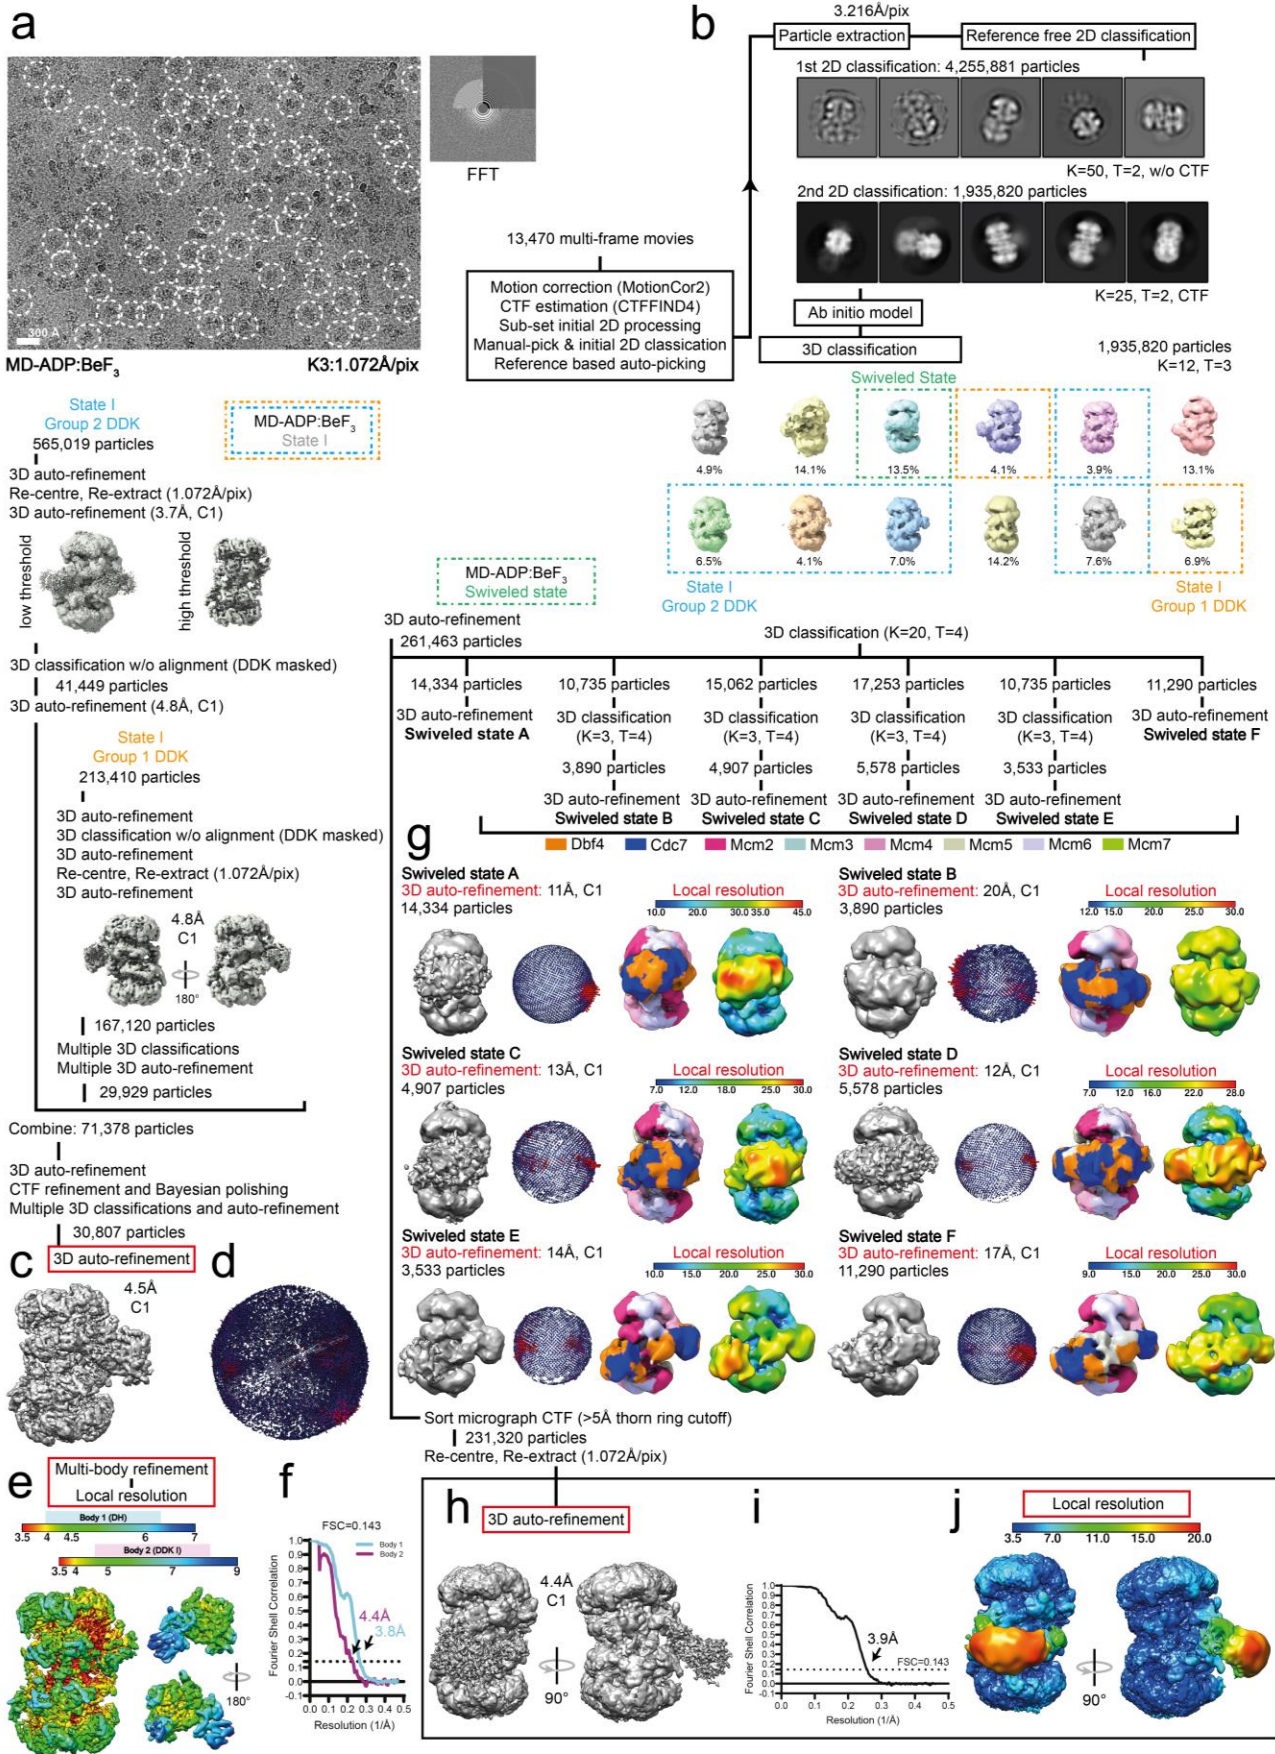

**Supplementary Figure 8. Cryo-EM image processing work-flow and 3D reconstruction of the MD-(ADP:BeF<sub>3</sub>) complex.**

**a.** Representative cryo-EM micrograph and corresponding fast Fourier transform (FFT). The micrograph features monodisperse particles of MD-(ADP:BeF<sub>3</sub>) which are indicated by dotted circles. Scale bar is also shown. **b.** Image data processing work-flow. **c.** 3D auto-refined map of MD-(ADP:BeF<sub>3</sub>) state I at 4.5Å mean resolution. **d.** Euler angle particle distribution of map shown in (c). **e.** Multibody-body auto-refined MD-(ADP:BeF<sub>3</sub>) state I maps of the DH and DDK. The MD-(ADP:BeF<sub>3</sub>) state I map was split into two separate bodies for multi-body refinement and the resulting local resolution estimation of the two different bodies is shown. The front and back view of the body featuring mainly DDK regions is shown. **f.** Gold-standard Fourier Shell Correlation plot of masked multi-body MD-(ADP:BeF<sub>3</sub>) maps. **g.** 3D auto-refined maps and local resolution estimation of six alternative swiveled structural states of the MD-(ADP:BeF<sub>3</sub>) complex. The 3D auto-refined map, euler angle particle distribution, local resolution filtered map colored (using key indicated) according to manual fitting of complex subunits and local resolution filtered map are shown. **h.** 3D auto-refined map of MD-(ADP:BeF<sub>3</sub>) swiveled state at 4.4Å mean resolution. **i.** Gold-standard Fourier Shell Correlation plot of post-processed MD-(ADP:BeF<sub>3</sub>) swiveled state map with a loose soft mask and a B-factor of -30 applied. **j.** Local resolution estimation of the MD-(ADP:BeF<sub>3</sub>) swiveled state map. The Euler angle particle distribution plots shown were generated using the RELION bild file output (blue bar represents the presence of a particle 2D view at a defined angle and red bar indicates a relatively high number of particles with that angle view). Resolution values shown are in angstroms.

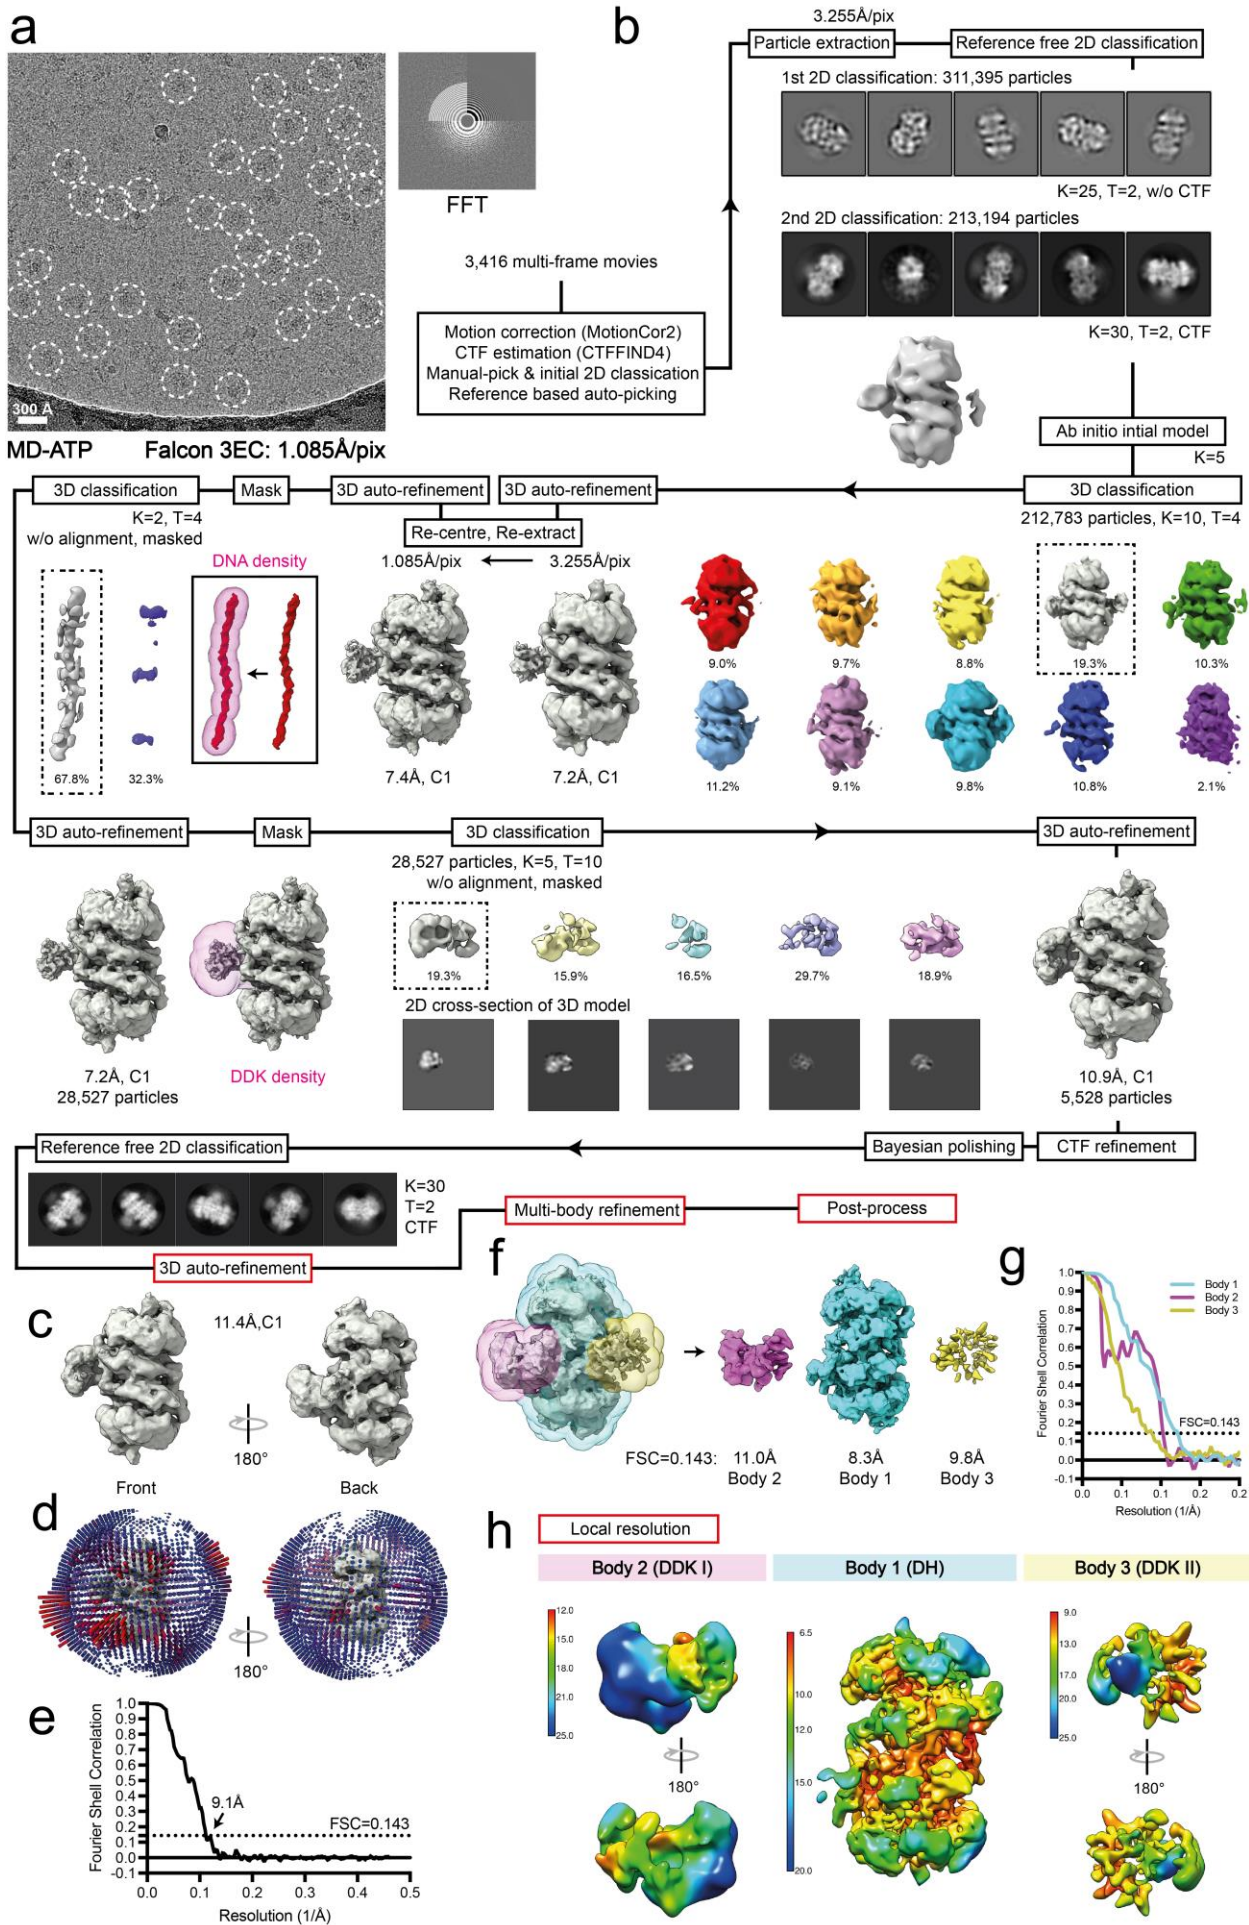



**Supplementary Figure 9. Cryo-EM image processing work-flow and 3D reconstruction of the MD-(ATP) complex.**

**a.** Representative cryo-EM micrograph and corresponding fast Fourier transform (FFT). The micrograph features monodisperse particles of MD-(ATP) which are indicated by dotted circles. Scale bar is also shown. **b.** Image data processing work-flow. **c.** 3D auto-refined map of MD-(ATP) at 11.4Å mean resolution. **d.** Euler angle particle distribution generated using the RELION bild file output (blue bar represents the presence of a particle 2D view at a defined angle and red bar indicates a relatively high number of particles with that angle view). **e.** Gold-standard Fourier Shell Correlation plot of post-processed MD-(ATP) map with a loose soft mask and a B-factor of -50 applied. **f.** The MD-(ATP) map split into three separate bodies for multi-body refinement. The bodies and the masks used are shown. **g.** Gold-standard Fourier Shell Correlation plot of masked multi-body MD-(ATP) maps. **h.** Local resolution estimation of the three different bodies of MD-(ATP). The front and back views of the bodies featuring mainly DDK regions are shown. Resolution values shown are in angstroms.

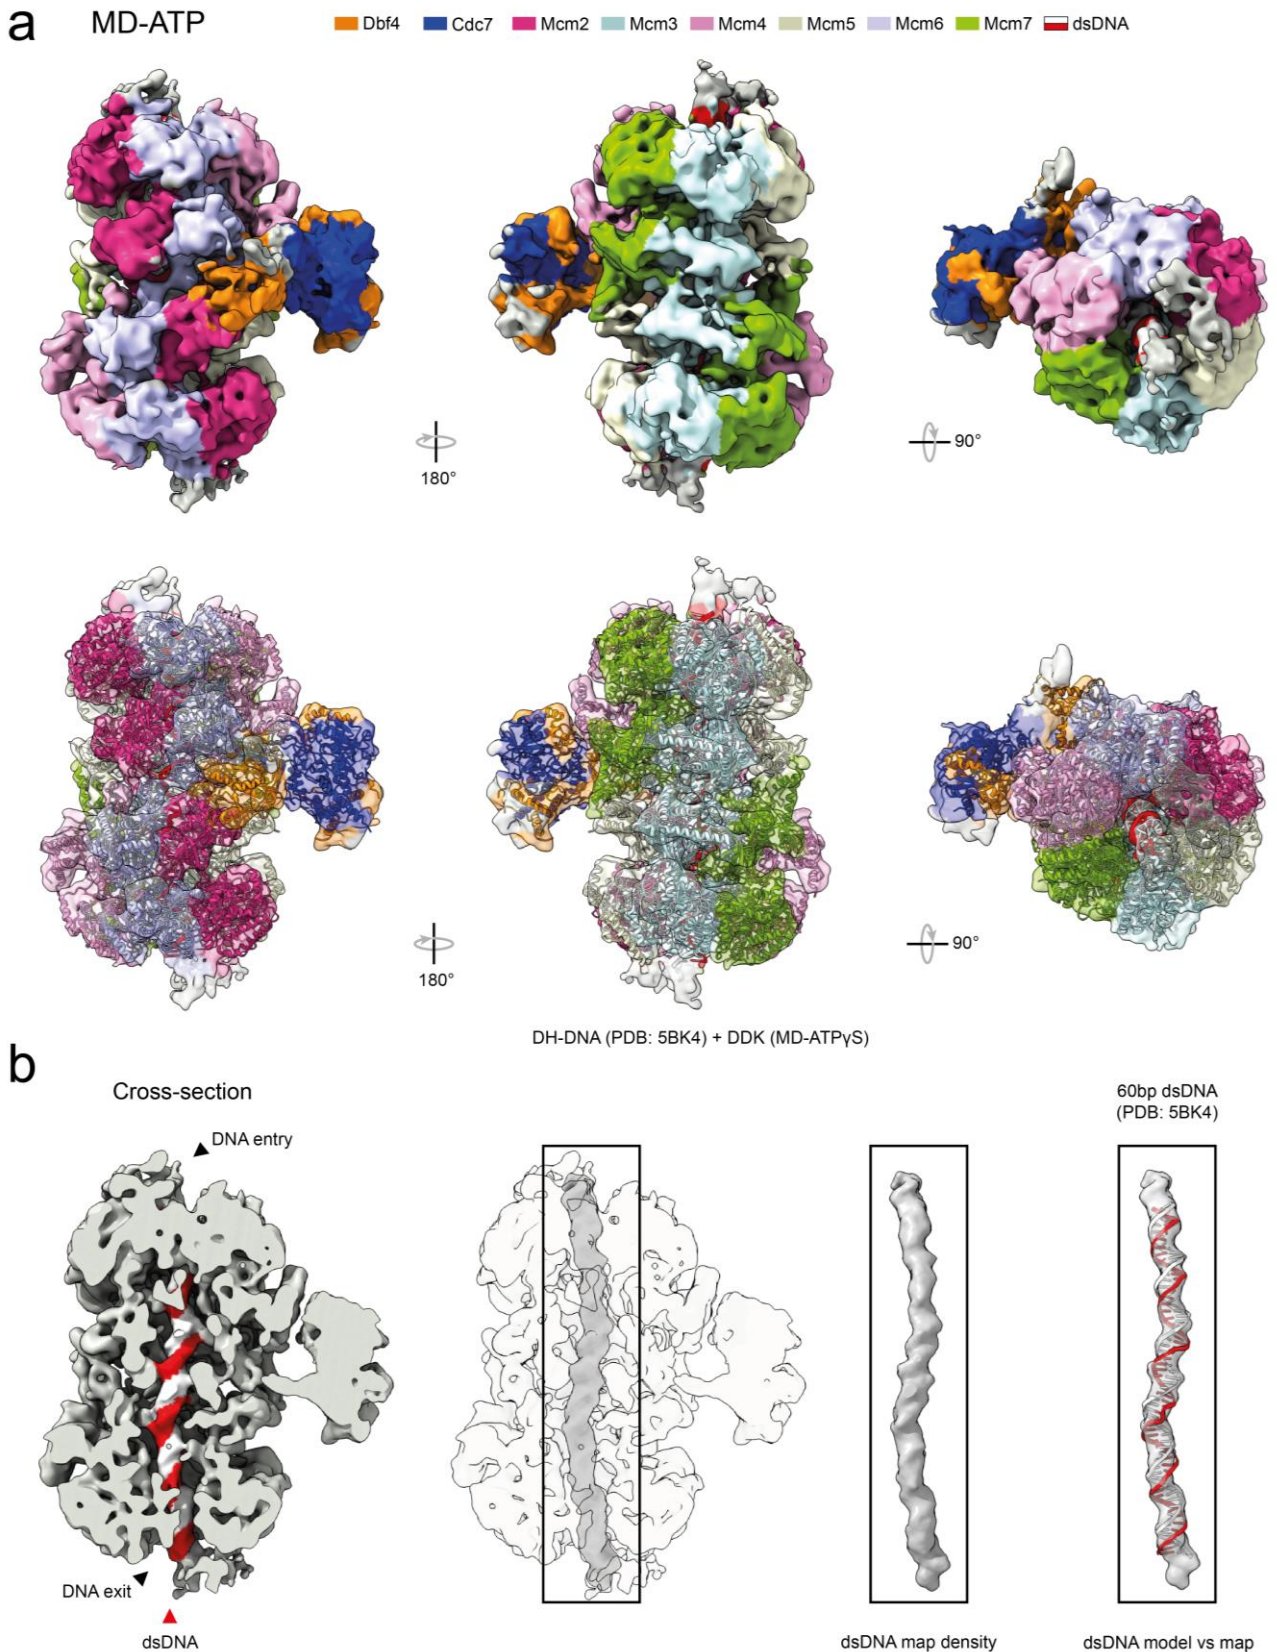

**Supplementary Figure 10. Structure of DDK bound to the MCM2-7 double hexamer in the presence of ATP.** **a.** Side and top views of the cryo-EM map of the MCM2-7-DDK (MD) complex in the presence of ATP. DH at 8.3Å mean resolution and DDK at 11.0Å mean resolution. The atomic models of the DH-DNA (PDB:5BK4) and DDK (MD-(ATP $\gamma$ S)) were docked into the cryo-EM multi-body maps of MD-(ATP). **b.** MD-(ATP) complexed with DNA. DNA is found at the center of the DH. Comparison of segmented DNA density from the MD-(ATP) map against the atomic DNA model from PDB:5BK4 reveals no differences in DNA shape or direction.

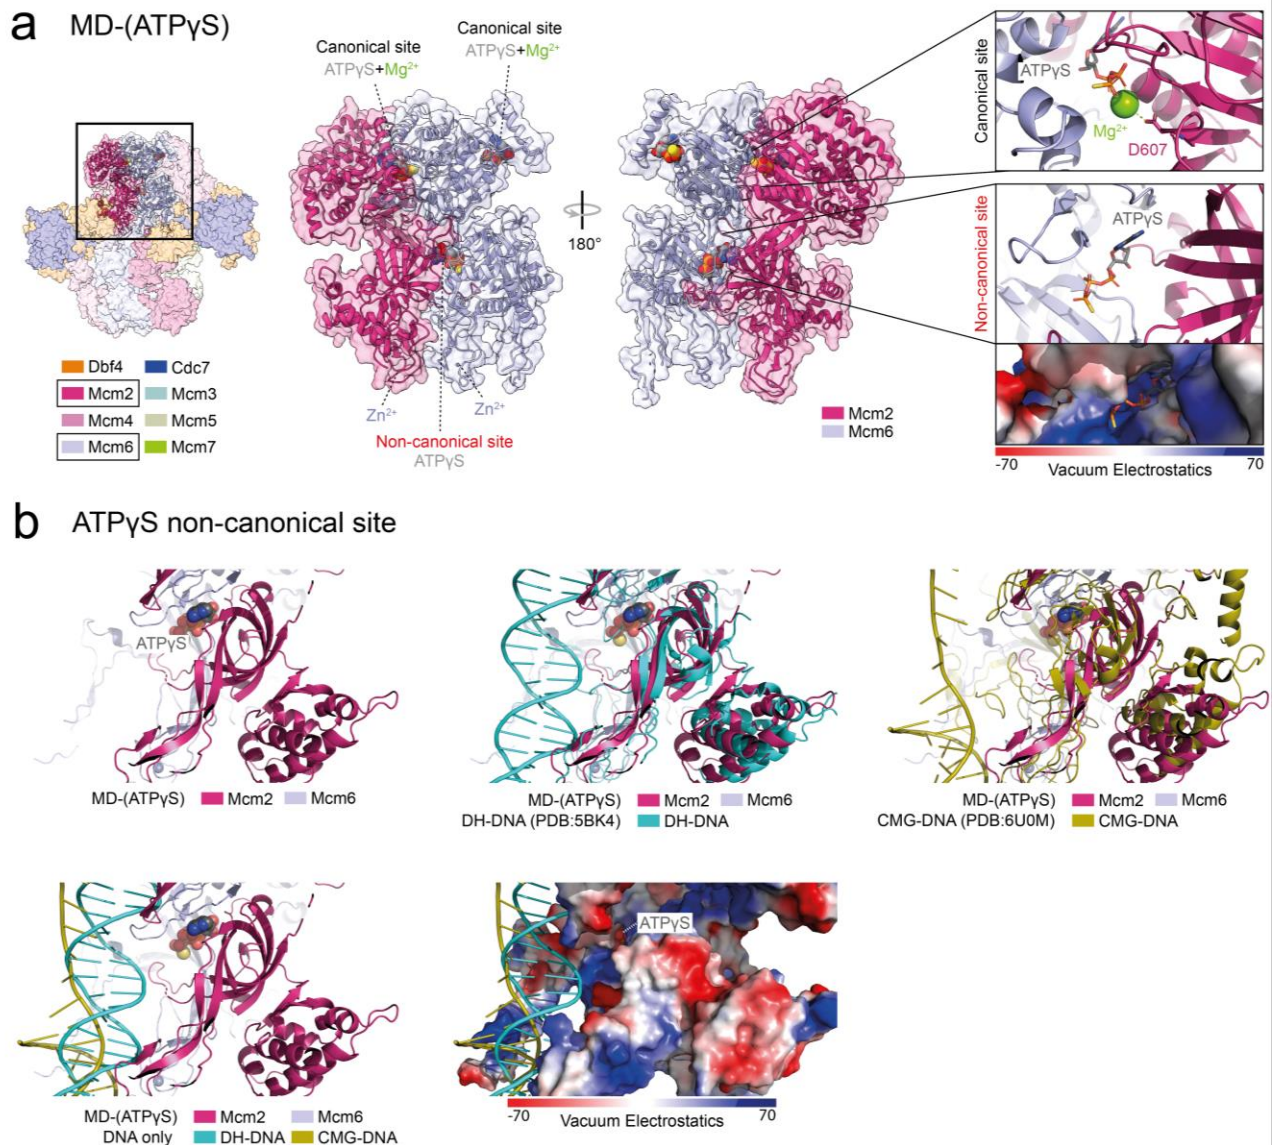

**Supplementary Figure 11. Analysis of a non-canonical second ATP $\gamma$ S binding site between Mcm2 and Mcm6 within the MD-(ATP $\gamma$ S) complex.**

**a.** Space-filling and cartoon view of the MD-(ATP $\gamma$ S) state III atomic model and focus on the Mcm2:Mcm6 interface. The Mcm2:Mcm6 interface featured an unexpected second ATP $\gamma$ S molecule at a non-canonical binding site. The ATP $\gamma$ S molecule was found to be less tightly sandwiched between Mcm2:Mcm6 than in canonical binding sites and the site featured a positively charged surface. **b.** Zoomed view of the ATP $\gamma$ S non-canonical binding site and comparison with DH-DNA and CMG-DNA structures. The dsDNA within the DH appears near the non-canonical binding site, suggesting this region may facilitate interaction with dsDNA. The ssDNA within the CMG, however rests further away from the site, suggesting the site is exclusive to dsDNA. The superimposed structures are colored according to the key and ATP $\gamma$ S is represented as a space-filling model.

**a**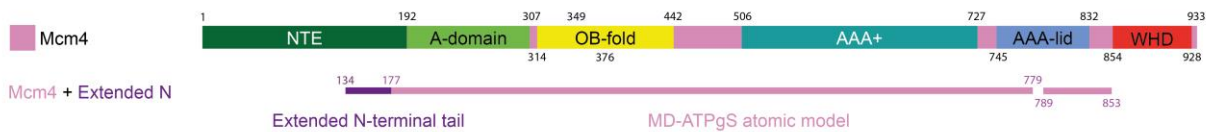**b** Molecular Dynamics Simulation Initial Models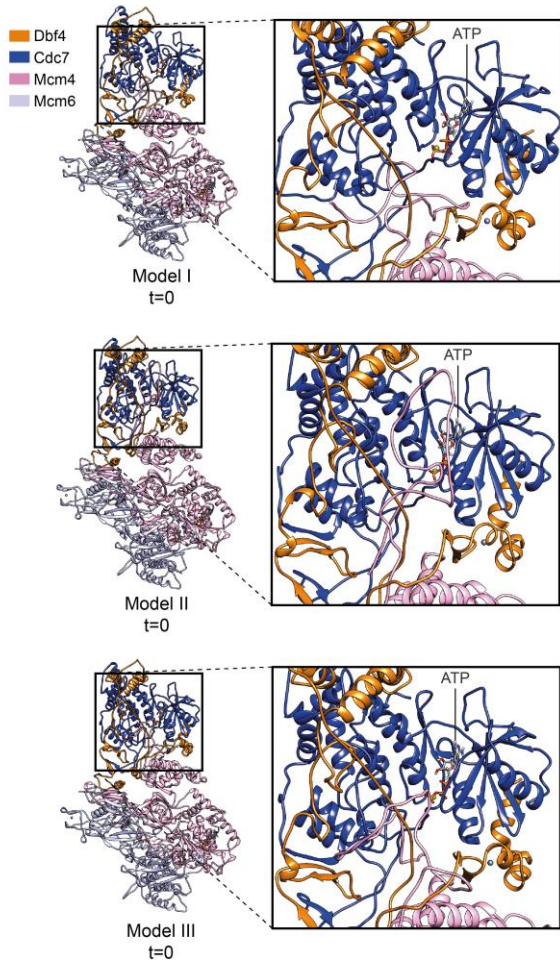**c**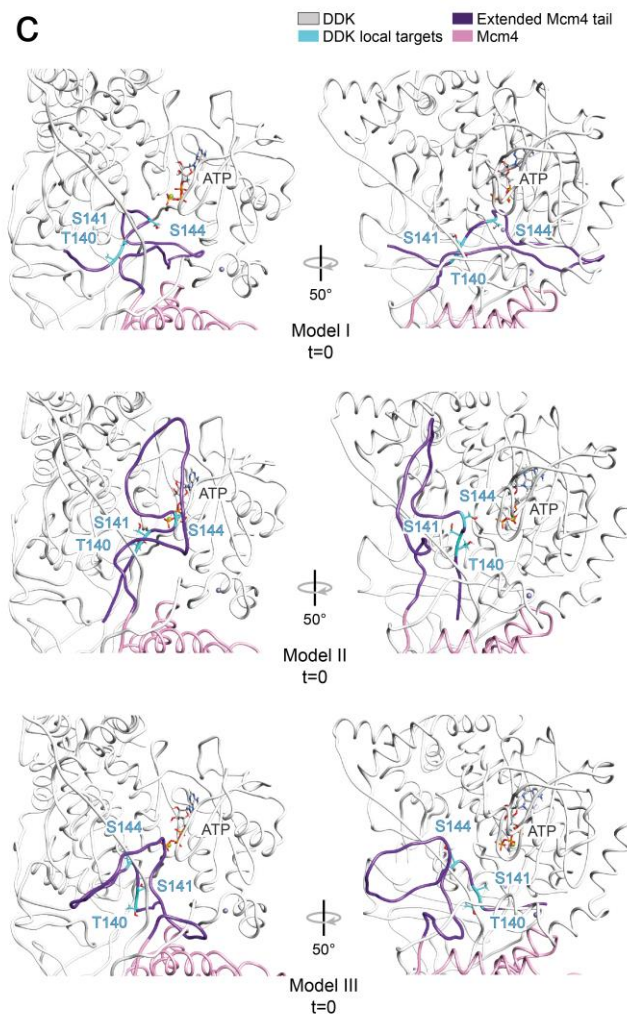**d** 400 ns Molecular Dynamics Simulation Overview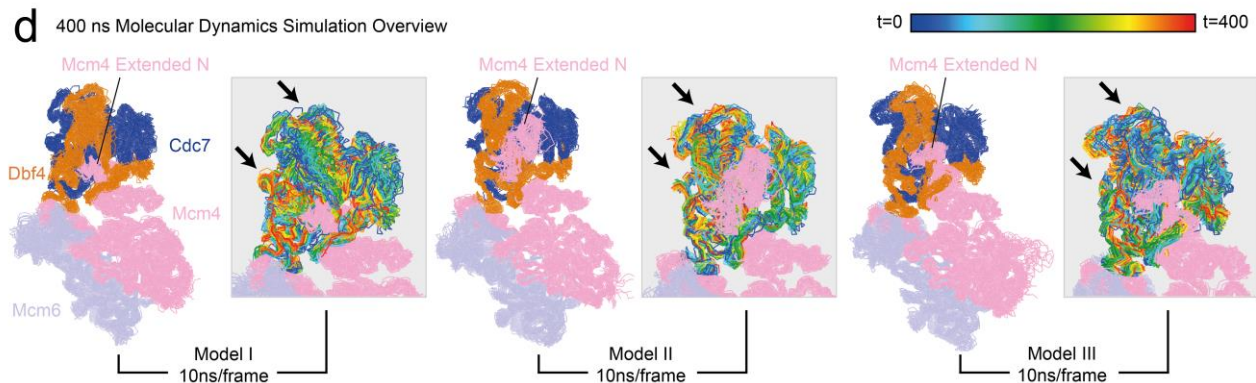

**Supplementary Figure 12. Mcm4 N-terminal tail extension and molecular dynamics simulation overview.**

**a.** Schematic diagram showing the extended N-terminal tail region of the Mcm4 (aa. 134-176) modelled using Rosetta (see Methods). Refer to Supplementary Fig 4 for domain abbreviations. **b.** Zoom onto the initial models (model I-III), featuring different Mcm4 tail poses, used for molecular dynamics simulations. The Mcm4(N)-Mcm6-DDK models feature: an N-terminal extended Mcm4, Mcm6, Cdc7 and Dbf4 without the HBRCT domain. **c.** Focused view on the Mcm4 extended tail poses in each of the models. The serine and threonine DDK target residues along the tail and near the Cdc7 active site are indicated in cyan. **d.** Snapshots showing an overview of the GROMACS molecular dynamics simulation for each model. Frames of each model trajectory were sampled every 10 ns during the 400 ns simulation. The regions of each protein subunit within the superimposed frames are represented and the respective successive order of the frames for the DDK subunits are represented by rainbow colors (blue (0 ns) to red (400ns)). The black arrows indicate the regions of DDK that display the most global movement. The segment of Dbf4 that supports the Cdc7 C-lobe appears to display relatively more movement compared to the rest of DDK.

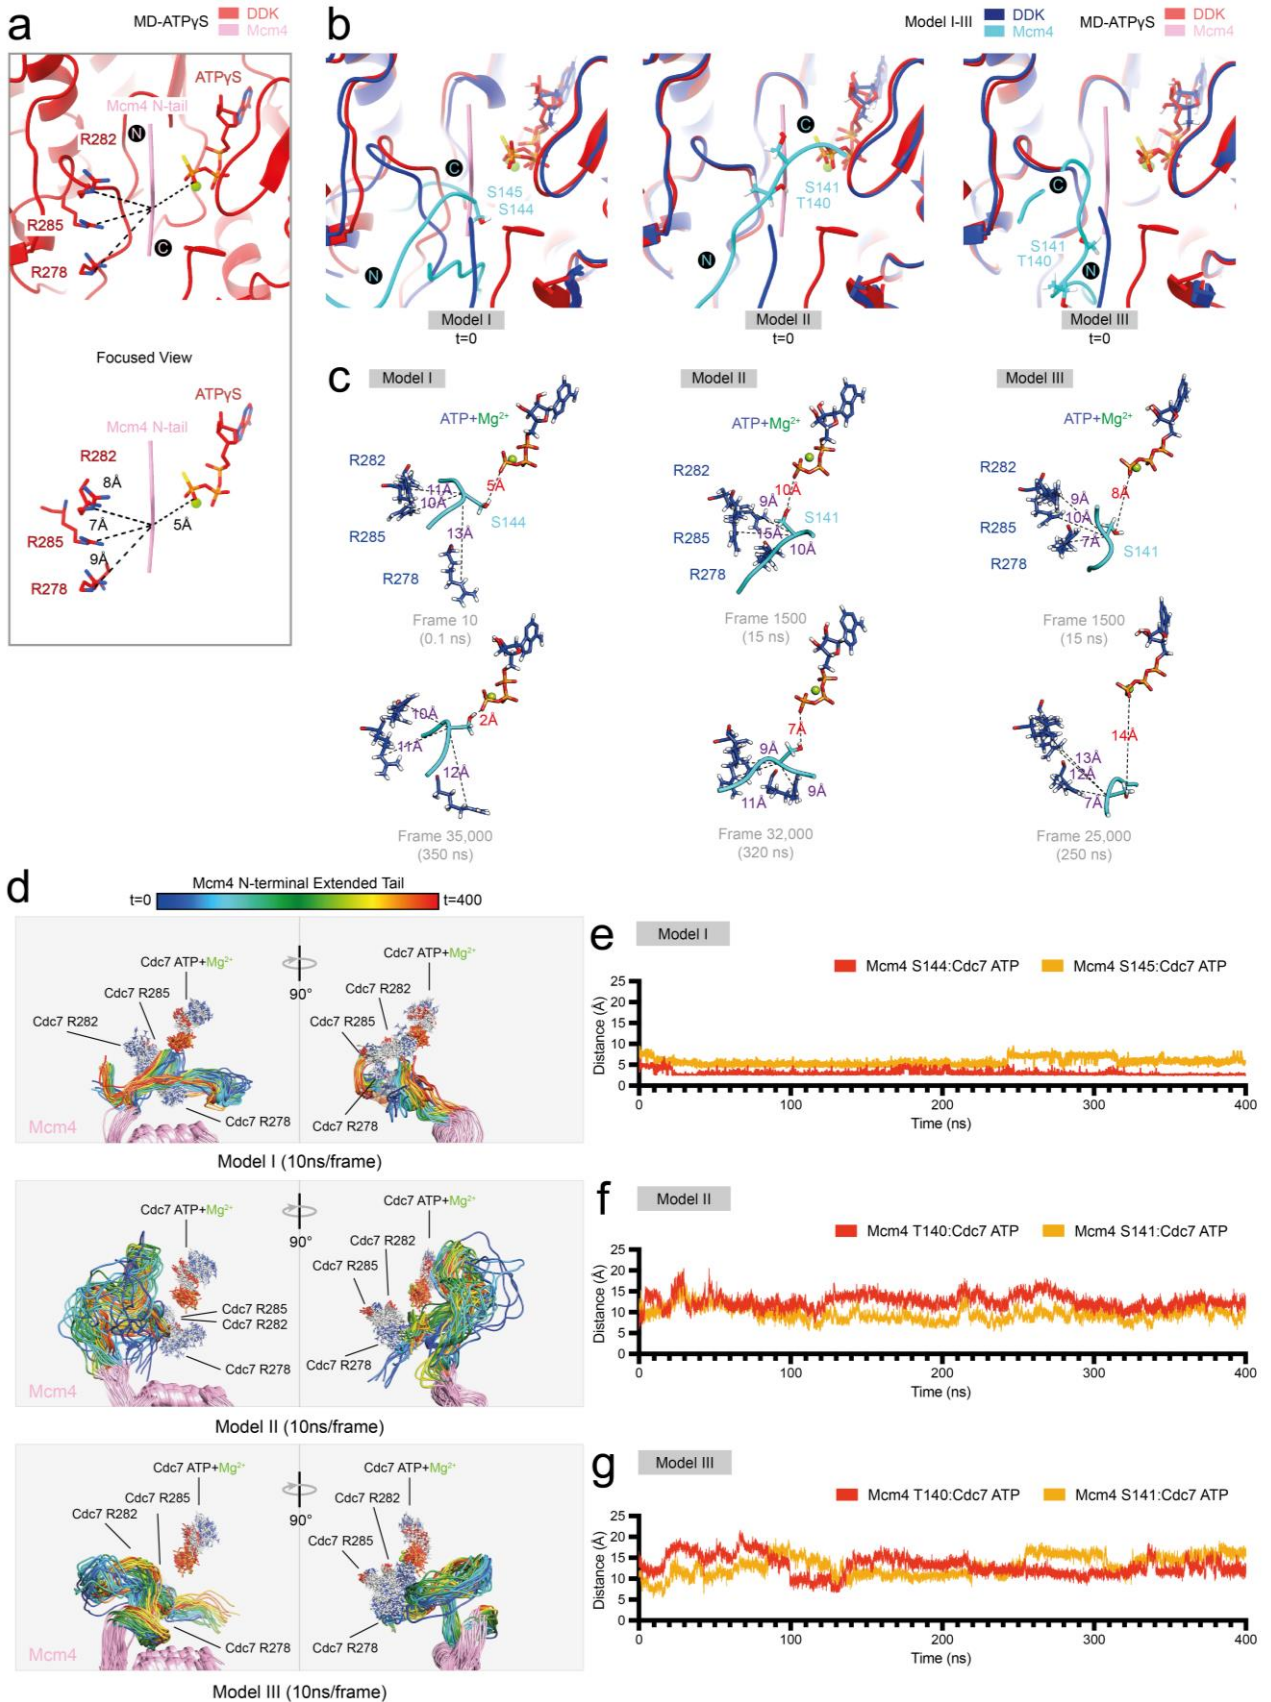

**Supplementary Figure 13. Analysis and comparison of different Mcm4 extended N-tail trajectory models during a 400 ns molecular dynamics simulation**

**a.** Zoomed view of the MD-(ATP $\gamma$ S) state III atomic model DDK active site and a focused view featuring the Mcm4 tail surrounded by Cdc7 R278, R282, R285 and ATP $\gamma$ S. The distance measurements between the backbone of the Mcm4 N-tail (CA atom) and the arginine residues (NE atom) or ATP $\gamma$ S (O3G atom) is indicated. **b.** Comparison of the different Mcm4 extended N-tail trajectory models (I-III) against the MD-(ATP $\gamma$ S) atomic model. **c.** Focused view of the DDK active site, showing the distance measurement between the nearest DDK Mcm4 target residue (OG atom) and Cdc7 ATP $\gamma$ S (O3G atom). **d.** Snapshots of model trajectory, sampled every 10 ns, during a 400 ns simulation. The successive order of the models is represented by rainbow colors (red to blue). The long flexible Mcm4 tail adopts multiple conformations throughout the simulation in all the models. **e-g.** Plot of distance measurement between the Mcm4 N-terminal tail (backbone CA atom) and Cdc7 ATP $\gamma$ S (O3G atom) throughout the entire simulation.

**Supplementary Table 1. Phosphorylation sites on MCM2-7 and Dbf4.**

Phosphorylation sites detected in all of three experiments are shown as +.

| Protein | Position | PEP       | Localization probability | Dbf4 |    |       |
|---------|----------|-----------|--------------------------|------|----|-------|
|         |          |           |                          | WT   | ΔN | SCR-G |
| DBF4    | 40       | 7.19E-185 | 1                        | +    | +  | +     |
| DBF4    | 228      | 1.69E-16  | 0.99816                  | +    | +  | +     |
| DBF4    | 235      | 2.04E-38  | 0.999698                 | +    | +  | +     |
| DBF4    | 397      | 0.0094433 | 0.914762                 | -    | +  | +     |
| DBF4    | 400      | 1.23E-09  | 1                        | -    | +  | +     |
| DBF4    | 413      | 8.86E-11  | 1                        | -    | +  | +     |
| DBF4    | 418      | 1.23E-07  | 0.999932                 | +    | +  | +     |
| DBF4    | 424      | 2.82E-05  | 0.83599                  | -    | +  | -     |
| DBF4    | 440      | 1.19E-08  | 1                        | +    | +  | +     |
| DBF4    | 467      | 0.0014561 | 1                        | +    | +  | +     |
| DBF4    | 473      | 5.09E-48  | 1                        | +    | +  | +     |
| DBF4    | 482      | 0.0007366 | 0.999963                 | +    | +  | +     |
| DBF4    | 496      | 1.31E-167 | 1                        | +    | +  | -     |
| DBF4    | 501      | 2.16E-55  | 0.999937                 | +    | +  | -     |
| DBF4    | 506      | 1.55E-08  | 0.999998                 | +    | +  | -     |
| DBF4    | 507      | 1.55E-08  | 0.999994                 | +    | +  | -     |
| DBF4    | 549      | 2.09E-07  | 0.999707                 | -    | -  | +     |
| DBF4    | 551      | 4.04E-31  | 0.998231                 | -    | +  | +     |
| DBF4    | 554      | 2.77E-39  | 0.911306                 | -    | +  | -     |
| DBF4    | 581      | 0.0007897 | 0.999199                 | +    | +  | +     |
| DBF4    | 585      | 0.0007875 | 0.989137                 | +    | +  | -     |
| DBF4    | 620      | 0.0031949 | 0.988769                 | +    | +  | +     |
| DBF4    | 621      | 0.005838  | 0.905227                 | -    | +  | +     |
| MCM2    | 105      | 9.54E-06  | 0.983084                 | +    | +  | +     |
| MCM2    | 107      | 9.54E-06  | 0.999998                 | +    | +  | +     |
| MCM2    | 170      | 0         | 1                        | +    | +  | +     |
| MCM2    | 725      | 0         | 1                        | +    | -  | +     |
| MCM3    | 859      | 0.0005746 | 0.849302                 | +    | +  | -     |
| MCM3    | 864      | 2.81E-19  | 0.998459                 | +    | +  | +     |
| MCM4    | 52       | 2.82E-32  | 1                        | +    | +  | +     |
| MCM4    | 56       | 3.04E-85  | 1                        | +    | +  | +     |
| MCM4    | 68       | 2.74E-55  | 0.991699                 | -    | +  | +     |
| MCM4    | 69       | 9.65E-16  | 0.835348                 | +    | -  | -     |
| MCM4    | 75       | 2.86E-30  | 0.914681                 | +    | -  | +     |
| MCM4    | 82       | 0.0001345 | 1                        | +    | -  | +     |
| MCM4    | 87       | 6.14E-05  | 1                        | +    | +  | +     |
| MCM4    | 112      | 0.0068063 | 0.932423                 | +    | -  | -     |
| MCM4    | 118      | 0.0023802 | 0.99071                  | +    | +  | +     |
| MCM4    | 119      | 0.0023802 | 0.872041                 | +    | +  | +     |



|      |     |           |          |   |   |   |
|------|-----|-----------|----------|---|---|---|
| MCM4 | 140 | 0.0002194 | 0.999669 | + | + | + |
| MCM4 | 141 | 0.0002194 | 0.999669 | + | + | + |
| MCM4 | 144 | 4.56E-07  | 0.906055 | + | + | + |
| MCM4 | 154 | 0.0239047 | 1        | + | - | + |
| MCM4 | 171 | 2.43E-224 | 0.96727  | + | + | - |
| MCM6 | 31  | 1.48E-53  | 0.74791  | + | - | - |
| MCM6 | 47  | 9.36E-46  | 0.811268 | + | + | + |
| MCM6 | 48  | 9.36E-46  | 0.811268 | + | + | + |
| MCM6 | 49  | 9.36E-46  | 0.811268 | + | + | + |
| MCM6 | 54  | 4.48E-22  | 0.806819 | + | + | + |
| MCM6 | 56  | 4.48E-22  | 0.806819 | + | + | + |
| MCM6 | 58  | 1.60E-20  | 0.760109 | - | + | - |
| MCM6 | 75  | 4.41E-241 | 1        | + | + | + |
| MCM6 | 78  | 2.04E-137 | 0.999823 | + | + | + |
| MCM6 | 232 | 2.02E-12  | 0.867325 | + | - | + |
| MCM7 | 175 | 1.08E-111 | 0.887763 | - | - | + |

**Supplementary Table 2. Analysis of the interaction interface between Dbf4 and Cdc7 based on the MD-(ATPyS) state III atomic model.** Polar contacts are coloured light blue and hydrophobic contacts are coloured yellow.

| Cdc7   |                       | Dbf4                            |                                       |                          |
|--------|-----------------------|---------------------------------|---------------------------------------|--------------------------|
| Domain | Residue               | Residue                         | Domain                                |                          |
| I      | Cdc7 E32/D108         | Dbf4 R701                       | motif-C                               |                          |
| II-VII | Backbone of Cdc7 V80  | Dbf4 N663                       | SCR                                   |                          |
|        | Cdc7 T81              | Dbf4 N510                       | motif-C                               |                          |
|        | Backbone of Cdc7 T81  | Backbone of Dbf4 E662           |                                       |                          |
|        | Cdc7 S83/R86          | DBf4 E662                       |                                       |                          |
|        | Cdc7 Y95              | Dbf4 N699                       |                                       |                          |
|        | Cdc7 R111             | Dbf4 D687/D694                  |                                       |                          |
|        | Cdc7 D114             | Dbf4 H680                       |                                       |                          |
|        | Cdc7 K138             | Backbone of Dbf4 Y346/Q345      | motif-M to SCR<br>(connecting region) |                          |
| KI-II  | Backbone of Cdc7 L261 | Dbf4 Q273                       | motif-M                               |                          |
|        | Backbone of Cdc7 Y265 | Backbone of Dbf4 H259           | motif-N to -M<br>(connecting region)  |                          |
|        | Backbone of Cdc7 K267 | Backbone of Dbf4 D257           | SCR                                   |                          |
|        | Backbone of Cdc7 K267 | Dbf4 K525                       | motif-M                               |                          |
|        | Cdc7 R271             | Backbone of Dbf4 Q273           |                                       |                          |
|        | Backbone of Cdc7 R272 | Backbone of Dbf4 A276           | SCR                                   |                          |
|        | Backbone of Cdc7 I273 | Dbf4 S518                       |                                       |                          |
| VIII-X | Cdc7 R316             | Backbone of Dbf4 G302/I301/R306 | motif-M                               |                          |
| KI-III | Backbone of Cdc7 G349 | Backbone of Dbf4 L271           |                                       |                          |
|        | Backbone of Cdc7 G351 | Backbone of Dbf4 Y269           |                                       |                          |
|        | Backbone of Cdc7 E353 | Backbone of Dbf4 Y267           |                                       |                          |
|        | Cdc7 E353             | Dbf4 H265                       |                                       |                          |
|        | Backbone of Cdc7 S355 | Backbone of Dbf4 H265           |                                       |                          |
|        | Backbone of Cdc7 I358 | Dbf4 Y296                       |                                       |                          |
|        | Cdc7 E380             | Backbone of Dbf4 G305           |                                       |                          |
|        | Cdc7 T385             | Backbone of Dbf4 F304           |                                       |                          |
|        | Backbone of Cdc7 F386 | Backbone of Dbf4 S374           |                                       |                          |
|        | Cdc7 Y389             | Backbone of Dbf4 D330           |                                       |                          |
|        | Cdc7 E394             | Dbf4 R341                       |                                       |                          |
|        | Cdc7 Y431             | Dbf4 Q345                       |                                       |                          |
|        | KI-III/VIII-X         | Surface of Cdc7                 |                                       | Dbf4 F309/P308/L299/I301 |
|        | KI-III                | Surface of Cdc7                 | Dbf4 V266/L268/I278/I279/L281/W283    |                          |
| II-VII | Surface of Cdc7       | Dbf4 A692/I693/L696             | motif-C                               |                          |

**Supplementary Table 3. Analysis of the interaction interface between Dbf4 and MCM2-7 based on the MD-(ATPyS) state III atomic model.** Polar contacts are coloured light blue and hydrophobic contacts are coloured yellow.

| Interaction interface | Dbf4                       | MCM2-7                |
|-----------------------|----------------------------|-----------------------|
| I                     | Dbf4 Y127                  | Mcm2 E217             |
|                       | Backbone of Dbf4 D132/D133 | Mcm2 T182             |
|                       | Dbf4 E135                  | Mcm4 S185             |
|                       | Backbone of Dbf4 F166      | Backbone of Mcm2 L216 |
|                       | Dbf4 F165                  | Mcm2 surface pocket   |
|                       | Dbf4 T168                  | Mcm2 G223             |
| II                    | Dbf4 L234 and L238         | Mcm6 surface          |
|                       | Dbf4 E241                  | Mcm6 R176             |
|                       | Dbf4 D248                  | Mcm4 R388             |
|                       | Backbone of Dbf4 D248      | Mcm4 T355             |
|                       | Dbf4 R249                  | Mcm4 E372             |
|                       | Dbf4 D250                  | Mcm4 R373             |
|                       | Backbone of Dbf4 D250      | Mcm4 H354             |
| III                   | Dbf4 T515                  | Mcm4 D286             |
|                       | Backbone of Dbf4 T515      | Mcm4 R195             |
|                       | Backbone of Dbf4 A517      | Mcm4 D278             |
|                       | Dbf4 S518                  | Mcm4 E297             |
|                       | Backbone of Dbf4 V519      | Mcm4 E297             |
|                       | Backbone of Dbf4 S521/V519 | Mcm4 Q274             |
|                       | Backbone of Dbf4 L530      | Backbone of Mcm4 W181 |
|                       | Backbone of Dbf4 V532      | Backbone of Mcm4 I179 |
| Backbone of Dbf4 V538 | Mcm4 N184                  |                       |
| IV                    | Dbf4 R665                  | Mcm4 D286             |
|                       | Backbone of Dbf4 K667      | Mcm4 N196             |
|                       | Dbf4 E678                  | Mcm4 K202/K204        |
|                       | Dbf4 K679                  | Backbone of Mcm4 M199 |

#### Supplementary Table 4. Plasmid list

| Plasmid | Description                             | Source               |
|---------|-----------------------------------------|----------------------|
| pCS313  | pESC-TRP MBP-Dbf4 Cdc7                  | Herrera et al., 2015 |
| pCS1323 | pESC-TRP MBP-Dbf4 $\Delta$ 110 Cdc7     | This study           |
| pCS1324 | pESC-TRP MBP-Dbf4 $\Delta$ 220 Cdc7     | This study           |
| pCS1325 | pESC-TRP MBP-Dbf4 $\Delta$ N motif Cdc7 | This study           |
| pCS1327 | pESC-TRP MBP-Dbf4 SCR-G Cdc7            | This study           |

**Supplementary Table 5. Cryo-EM data collection parameters**

| <b>Sample</b>                                                | <b>MD-(ATP<math>\gamma</math>S)</b> | <b>MD-(ADP:BeF<sub>3</sub>)</b> | <b>MD-(ATP)</b> |
|--------------------------------------------------------------|-------------------------------------|---------------------------------|-----------------|
| <b>Data collection parameters</b>                            |                                     |                                 |                 |
| <b>Microscope</b>                                            | Titan Krios                         | Titan Krios                     | Titan Krios     |
| <b>Magnification</b>                                         | 81,000x                             | 81,000x                         | 75,000x         |
| <b>Voltage (kV)</b>                                          | 300                                 | 300                             | 300             |
| <b>Camera</b>                                                | Gatan K3                            | Gatan K3                        | Falcon 3EC      |
| <b>Imaging mode</b>                                          | Super-resolution                    | Super-resolution                | Counting        |
| <b>Shots per hole</b>                                        | 3                                   | 3                               | 2               |
| <b>Total electron exposure (e<sup>-</sup>/Å<sup>2</sup>)</b> | 45.9                                | 48.4                            | 50.0            |
| <b>Total number of frames</b>                                | 54                                  | 40                              | 19              |
| <b>Defocus range (<math>\mu</math>m)</b>                     | -1.0 to -3.0                        | -1.7 to -3.7                    | -1.6 to -3.2    |
| <b>Automated data collection software</b>                    | EPU                                 | EPU                             | EPU             |
| <b>Pixel size (Å)</b>                                        | 0.530                               | 0.536                           | 1.085           |

**Supplementary Table 6. Summary of cryo-EM data processing of MD-(ATPyS) state I-III**

| <b>Data processing</b>                     | <b>MD-(ATPyS) state I</b> | <b>MD-(ATPyS) state II</b>        | <b>MD-(ATPyS) state III</b>                            |
|--------------------------------------------|---------------------------|-----------------------------------|--------------------------------------------------------|
| <b>Number of multi-frame movies</b>        | 9,909                     |                                   |                                                        |
| <b>Symmetry imposed</b>                    | C1                        | C1                                | C1/C2                                                  |
| <b>Initial auto-picked particles (no.)</b> | 2,572,593                 |                                   |                                                        |
| <b>Initial particle images (no.)</b>       | 258,684                   | 138,647                           | 1,235,868                                              |
| <b>Final particle images (no.)</b>         | 12,800                    | 22,459                            | 73,093                                                 |
| <b>Map resolution (Å)</b>                  |                           |                                   |                                                        |
| <b>FSC threshold (0.143) unmasked</b>      | 7.1                       | 4.3                               | 3.7                                                    |
| <b>FSC threshold (0.143) masked</b>        | 4.2                       | 3.7                               | 3.2                                                    |
| <b>Multi-body map</b>                      | -                         | Body 1: DH<br>Body 2: DDK I       | Body 1: DH<br>Body 2: DDK I<br>Body 3: DDK II          |
| <b>Local resolution range (Å)</b>          | 3.5 - 10.0                | DH: 3.0 - 5.0<br>DDK I: 5.0 - 9.0 | DH: 2.9 - 4.0<br>DDK I: 3.5 - 4.0<br>DDK II: 3.5 - 4.0 |
| <b>Applied B-factor (Å<sup>2</sup>)</b>    | 0                         | DH: -70<br>DDK I: -50             | DH: -85<br>DDK I: -90<br>DDK II: -100                  |

**Supplementary Table 7. Summary of cryo-EM data processing of MD-(ADP:BeF<sub>3</sub>) state I and swivelled state**

| Data processing                            | MD-(ADP:BeF <sub>3</sub> )<br>state I | MD-<br>(ADP:BeF <sub>3</sub> )<br>swiveled | MD-(ADP:BeF <sub>3</sub> ) swiveled state |         |        |        |         |        |
|--------------------------------------------|---------------------------------------|--------------------------------------------|-------------------------------------------|---------|--------|--------|---------|--------|
|                                            |                                       |                                            | A                                         | B       | C      | D      | E       | F      |
| <b>Number of multi-frame movies</b>        | 13,470                                |                                            |                                           |         |        |        |         |        |
| <b>Symmetry imposed</b>                    | C1                                    |                                            |                                           |         |        |        |         |        |
| <b>Initial auto-picked particles (no.)</b> | 4,255,881                             |                                            |                                           |         |        |        |         |        |
| <b>Initial particle images (no.)</b>       | 778,429                               | 261,463                                    |                                           |         |        |        |         |        |
| <b>Final particle images (no.)</b>         | 30,807                                | 231,320                                    | 14,334                                    | 3,890   | 4,907  | 5,578  | 3,533   | 11,290 |
| <b>Map resolution (Å)</b>                  |                                       |                                            |                                           |         |        |        |         |        |
| <b>FSC threshold (0.143) unmasked</b>      | 4.1                                   | 4.4                                        | 11                                        | 20      | 13     | 12     | 14      | 17     |
| <b>FSC threshold (0.143) masked</b>        | 3.6                                   | 3.9                                        | 9                                         | 18      | 9      | 9      | 12      | 13     |
| <b>Multi-body map</b>                      | Body 1: DH<br>Body 2: DDK I           | -                                          | -                                         | -       | -      | -      | -       | -      |
| <b>Local resolution range (Å)</b>          | DH: 3.5 - 6.0<br>DDK I: 4.0 - 7.0     | 3.5 - 20.0                                 | 10 - 45                                   | 12 - 25 | 7 - 30 | 7 - 28 | 10 - 25 | 9 - 25 |
| <b>Applied B-factor (Å<sup>2</sup>)</b>    | DH: -30<br>DDK I: -50                 | -30                                        | 0                                         | 0       | 0      | 0      | 0       | 0      |

**Supplementary Table 8. Summary of cryo-EM data processing of MD-(ATP)**

| <b>Data processing</b>                     | <b>MD-(ATP)</b>                                      |
|--------------------------------------------|------------------------------------------------------|
| <b>Number of multi-frame movies</b>        | 3,416                                                |
| <b>Symmetry imposed</b>                    | C1                                                   |
| <b>Initial auto-picked particles (no.)</b> | 311,395                                              |
| <b>Initial particle images (no.)</b>       | 213,194                                              |
| <b>Final particle images (no.)</b>         | 5,528                                                |
| <b>Map resolution (Å)</b>                  |                                                      |
| <b>FSC threshold (0.143) unmasked</b>      | 11.4                                                 |
| <b>FSC threshold (0.143) masked</b>        | 9.1                                                  |
| <b>Multi-body map</b>                      | Body 1: DH<br>Body 2: DDK I<br>Body 3: DDK II        |
| <b>Local resolution range (Å)</b>          | DH: 6.5-15.0<br>DDK I: 12.0-25.0<br>DDK II: 9.0-25.0 |
| <b>Applied B-factor (Å<sup>2</sup>)</b>    | Body 1: -100<br>Body 2: -50<br>Body 3: +100          |



**Supplementary Table 9. Summary of structure validation statistics.**

|                                          |                         | <b>MD-(ATP<sub>γ</sub>S) state III</b> | <b>MD-(ADP:BeF<sub>3</sub>) state I</b> |
|------------------------------------------|-------------------------|----------------------------------------|-----------------------------------------|
| Initial model used (PDB code)            |                         | 6YA7, 3QBZ, 6EYC, 6YAT                 | 6YA8, 3QBZ, 6EYC, 6YAT                  |
| <b>Model</b>                             |                         |                                        |                                         |
| Composition (#)                          |                         |                                        |                                         |
|                                          | Chains                  | 18                                     | 15                                      |
|                                          | Atoms                   | 74358 (Hydrogens: 0)                   | 67420 (Hydrogens: 0)                    |
|                                          | Residues                | Protein: 9290 Nucleotide: 0            | Protein: 8455 Nucleotide: 0             |
|                                          | Water                   | 0                                      | 0                                       |
|                                          | Ligands                 | MG: 14                                 | MG: 14                                  |
|                                          |                         | AGS: 12                                | BEF: 7                                  |
|                                          |                         | ZN: 14                                 | ZN: 12                                  |
|                                          | ADP: 4                  | ADP: 13                                |                                         |
| Bonds (RMSD)                             |                         |                                        |                                         |
|                                          | Length (Å) (# > 4σ)     | 0.010 (162)                            | 0.008 (112)                             |
|                                          | Angles (°) (# > 4σ)     | 1.315 (138)                            | 1.051 (29)                              |
| MolProbity score                         |                         | 1.79                                   | 1.79                                    |
| Clash score                              |                         | 11.96                                  | 11.49                                   |
| Ramachandran plot (%)                    |                         |                                        |                                         |
|                                          | Outliers                | 0.00                                   | 0.00                                    |
|                                          | Allowed                 | 3.19                                   | 3.31                                    |
|                                          | Favored                 | 96.81                                  | 96.69                                   |
| Rama-Z (Ramachandran plot Z-score, RMSD) |                         |                                        |                                         |
|                                          | whole (N = 9150)        | -0.49 (0.09)                           | 0.56 (0.09)                             |
|                                          | helix (N = 3584)        | 0.41 (0.09)                            | 1.56 (0.09)                             |
|                                          | sheet (N = 1592)        | -0.92 (0.12)                           | -0.38 (0.14)                            |
|                                          | loop (N = 3974)         | -0.61 (0.10)                           | -0.31 (0.10)                            |
| Rotamer outliers (%)                     |                         | 0.34                                   | 0.64                                    |
| Cβ outliers (%)                          |                         | 0.34                                   | 0.05                                    |
| Peptide plane (%)                        |                         |                                        |                                         |
|                                          | Cis proline/general     | 0.0/0.0                                | 0.0/0.0                                 |
|                                          | Twisted proline/general | 0.0/0.0                                | 0.0/0.0                                 |
| CaBLAM outliers (%)                      |                         | 1.55                                   | 1.46                                    |
| ADP (B-factors)                          |                         |                                        |                                         |
|                                          | Iso/Aniso (#)           | 74358/0                                | 67420/0                                 |
|                                          | Protein                 | 1.24/112.22/30.74                      | 9.99/149.96/66.43                       |
|                                          | Ligand                  | 12.06/136.68/68.98                     | 13.70/224.89/69.88                      |
| Occupancy                                |                         |                                        |                                         |
|                                          | Mean                    | 1.00                                   | 1.00                                    |
|                                          | occ = 1 (%)             | 100.00                                 | 100.00                                  |
|                                          | 0 < occ < 1 (%)         | 0.00                                   | 0.00                                    |
|                                          | occ > 1 (%)             | 0.00                                   | 0.00                                    |
| <b>Model vs. Data</b>                    |                         |                                        |                                         |
|                                          | CC (mask)               | 0.80                                   | 0.77                                    |
|                                          | CC (box)                | 0.69                                   | 0.74                                    |
|                                          | CC (peaks)              | 0.66                                   | 0.67                                    |
|                                          | CC (volume)             | 0.78                                   | 0.77                                    |
|                                          | Mean CC for ligands     | 0.73                                   | 0.73                                    |
